# Supplementary material for: UBTD1 regulates ceramide balance and endolysosomal positioning to coordinate EGFR signaling
Source: eLife journal article supplement (doi:10.7554/elife.68348), 2021-04-22
Supplement: fig1-figsupp1-data1 [file elife-68348-fig1-figsupp1-data1-v2.pdf]

**B**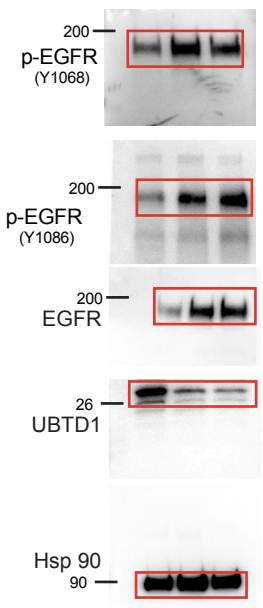**D**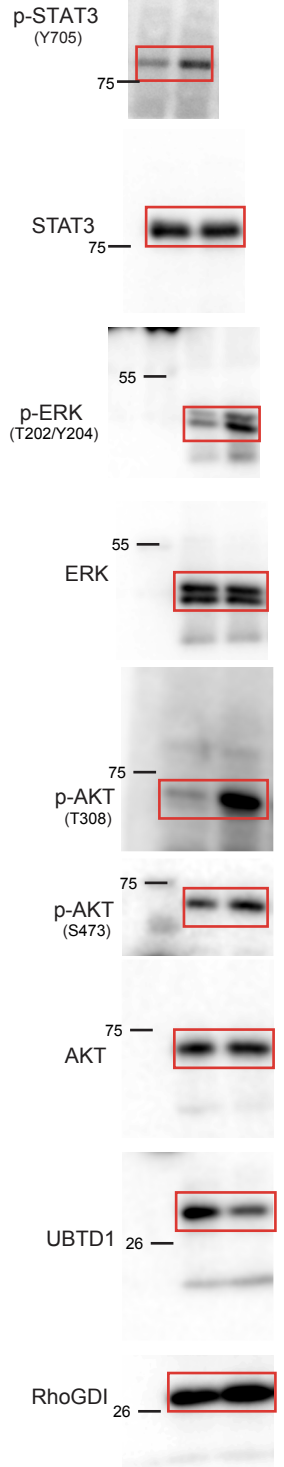**E**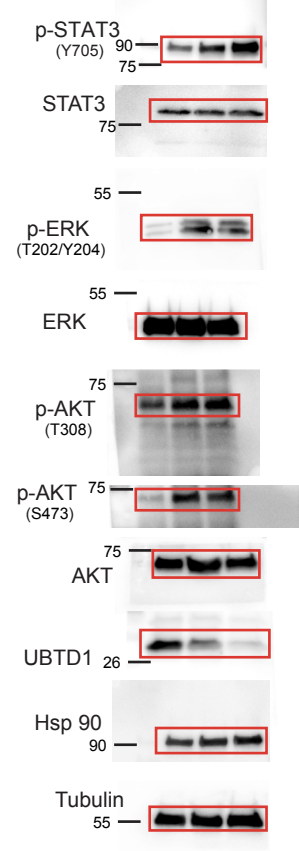**Figure 1-source data 2**
