# Supplementary material for: UBTD1 regulates ceramide balance and endolysosomal positioning to coordinate EGFR signaling
Source: eLife journal article supplement (doi:10.7554/elife.68348), 2021-04-22

**D**

IP :UBTD1

75  
P62

UBTD1 26

Total

Hsp90 90

75  
P62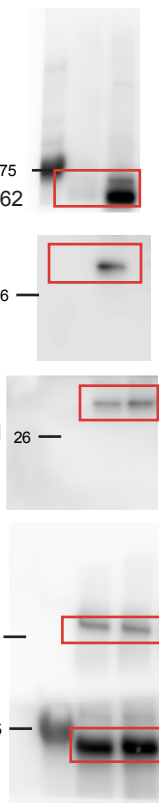

Supplement: fig5-data1 [file elife-68348-fig5-data1-v2.pdf]
