# Supplementary material for: UBTD1 regulates ceramide balance and endolysosomal positioning to coordinate EGFR signaling
Source: eLife. 2021 Apr 22;10:e68348. doi: 10.7554/eLife.68348 (PMC8118655; doi:10.7554/eLife.68348)
Supplement: Figure 1—source data 2. [file elife-68348-fig1-data2.xlsx]

## Sheet: Row data for Figure 1 
A	BASAL		B	siCTRL 1	siCTRL 2	siCTRL 3	siUBTD1 1	siUBTD1 2	siUBTD1 3								D	+EGF		E	siCTRL 1	siCTRL 2	siCTRL 3	siCTRL 4	siCTRL 5	siCTRL 6	siCTRL 7	siUBTD1 1	siUBTD1 2	siUBTD1 3	siUBTD1 4	siUBTD1 5	siUBTD1 6	siUBTD1 7
Akt 1/2/3 (S473)	-0.174871		p-EGFR (Y1068)	100	100	100	120.841	113.794	145.122								Akt 1/2/3 (S473)	10.8138		-	100	100	100	100	100	100	100	134.225	144.25	115.789	148.201	173.325	154.393	145.292
Akt 1/2/3 (T308)	0.192622		p-EGFR (Y1086)	100	100	100	133.97	107.212	137.51								Akt 1/2/3 (T308)	1.50243		EGF 10	124.738	118.842	125.486	111.48	134.06	105.12	110.791	134.075	126.773	145.881	136.963	146.809	105.015	178.308
AMPKa1 (T183)	1.03584																AMPKa1 (T183)	1.63671		EGF 20	142.739	142.769	145.043	121.431	145.522	125.83	145.986	237.743	109.834	154.171	133.491	93.7028	116.986	115.714
AMPKa2 (T172)	0.459538																AMPKa2 (T172)	4.76964		EGF 50	127.536	142.41	135.392	157.807	114.832	136.679	149.607	219.533	117.525	111.988	120.982	122.149	109.295	128.628
Chk-2 (T68)	-0.284468																Chk-2 (T68)	1.71908		EGF 100	133.581	130.633	134.898	127.925	120.278	110.776	134.404	112.003	98.0572	127.655	117.525	121.056	107.574	134.778
c-Jun (S63)	0.719999		Times(h)	siCTRL 1	siCTRL 2	siCTRL 3	siCTRL 4	siCTRL 5	siCTRL 6	siUBTD1 1	siUBTD1 2	siUBTD1 3	siUBTD1 4	siUBTD1 5	siUBTD1 6		c-Jun (S63)	-0.783092
CREB (S133)	-0.0871119		30:00:00	1.48	1.49	1.47	1.43	1.44	1.45	1.41	1.46	1.52	1.45	1.46	1.46		CREB (S133)	10.4956
EGF R (Y1086)	2.42409		32:00:00	1.55	1.56	1.57	1.52	1.55	1.56	1.53	1.58	1.66	1.58	1.6	1.6		EGF R (Y1086)	14.3749
eNOS (S1177)	0.290961		34:00:00	1.56	1.58	1.58	1.54	1.56	1.57	1.55	1.63	1.7	1.63	1.64	1.65		eNOS (S1177)	1.24798		F	siCTRL 1	siCTRL 2	siCTRL 3	siUBTD1 1	siUBTD1 2	siUBTD1 3
ERK1/2 (T202/Y204, T185/Y187)	-0.300206		36:00:00	1.59	1.61	1.61	1.56	1.57	1.59	1.61	1.68	1.76	1.68	1.67	1.7		ERK1/2 (T202/Y204, T185/Y187)	4.93946		-	96.7067	102.275	101.019	133.003	138.362	152.805
FAK (Y397)	-0.619782		38:00:00	1.62	1.63	1.64	1.59	1.61	1.62	1.63	1.73	1.82	1.73	1.74	1.75		FAK (Y397)	2.97891		EGF	122.453	131.747	128.105	128.858	142.799	153.433
Fgr (Y412)	0.0775475		40:00:00	1.65	1.65	1.66	1.62	1.64	1.65	1.69	1.77	1.9	1.78	1.81	1.81		Fgr (Y412)	1.28409		Gefitinib	89.5897	93.6924	91.6829	96.6648	96.288	103.196
Fyn (Y420)	0.270714		42:00:00	1.67	1.68	1.69	1.65	1.67	1.67	1.74	1.83	1.98	1.83	1.85	1.87		Fyn (Y420)	0.326665		EGF+Gefitinib	102.813	88.8362	91.4318	109.182	110.606	105.163
GSK-3a/ß (S21/S9)	2.17995		44:00:00	1.69	1.7	1.71	1.67	1.68	1.7	1.78	1.88	2.05	1.89	1.91	1.97		GSK-3a/ß (S21/S9)	9.16748
Hck (Y411)	0.675655		46:00:00	1.72	1.72	1.73	1.69	1.7	1.73	1.82	1.94	2.12	1.94	1.98	2.02		Hck (Y411)	-0.412421
HSP27 (S78/S82)	0.344567		48:00:00	1.74	1.75	1.75	1.7	1.73	1.75	1.87	2.01	2.16	2	2.04	2.09		HSP27 (S78/S82)	1.97522
JNK 1/2/3 (T183/Y185, T221/Y223)	1.61561																JNK 1/2/3 (T183/Y185, T221/Y223)	5.0224
Lck (Y394)	-0.0248525																Lck (Y394)	1.69877
Lyn (Y397)	-0.0891924																Lyn (Y397)	1.11991
MSK1/2 (S376/S360)	0.110205																MSK1/2 (S376/S360)	3.26552
p27 (T198)	0.232033																p27 (T198)	0.134277
p38a (T180/Y182)	-0.842023																p38a (T180/Y182)	1.53459
p53 (S15)	-0.0751293																p53 (S15)	-0.736829
p53 (S392)	0.411769																p53 (S392)	0.828227
p53 (S46)	0.086592																p53 (S46)	-1.20736
p70 S6 Kinase (T389)	0.606966																p70 S6 Kinase (T389)	0.548955
p70 S6 Kinase (T421/S424)	0.107642																p70 S6 Kinase (T421/S424)	1.91711
PDGF Rß (Y751)	0.156681																PDGF Rß (Y751)	1.72077
PLC-?1 (Y783)	0.103437																PLC-?1 (Y783)	0.949528
PRAS40 (T246)	0.123393																PRAS40 (T246)	0.0366722
PYK2 (Y402)	0.395749																PYK2 (Y402)	1.16787
RSK1/2/3 (S380/S386/S377)	-0.155176																RSK1/2/3 (S380/S386/S377)	1.36421
Src (Y419)	0.175385																Src (Y419)	2.60429
STAT2 (Y689)	0.583813																STAT2 (Y689)	3.47765
STAT3 (S727)	0.457155																STAT3 (S727)	2.67651
STAT3 (Y705)	0.547681																STAT3 (Y705)	1.10581
STAT5a (Y694)	0.133336																STAT5a (Y694)	4.10052
STAT5a/b (Y694/Y699)	0.0312951																STAT5a/b (Y694/Y699)	2.78257
STAT5b ( Y699)	0.0548479																STAT5b ( Y699)	2.59019
STAT6 (Y641)	0.327562																STAT6 (Y641)	3.02292
TOR (S2448)	0.178902																TOR (S2448)	2.1315
WNK1 (T60)	0.314436																WNK1 (T60)	-0.846846
Yes (Y426)	-0.0324653																Yes (Y426)	1.39242
ß-Catenin	-0.0779466																ß-Catenin	15.4565
G	Starved
Akt 1/2/3 (S473)	0.776274
Akt 1/2/3 (T308)	0.132715
AMPKa1 (T183)	0.155329
AMPKa2 (T172)	0.131974
Chk-2 (T68)	0.381835
c-Jun (S63)	-0.372567
CREB (S133)	1.10658
EGF R (Y1086)	1.52178
eNOS (S1177)	0.097127
ERK1/2 (T202/Y204, T185/Y187)	2.10936
FAK (Y397)	0.15848
Fgr (Y412)	0.13531
Fyn (Y420)	0.0426321
GSK-3a/ß (S21/S9)	0.885079
Hck (Y411)	0.0769231
HSP27 (S78/S82)	0.102873
JNK 1/2/3 (T183/Y185, T221/Y223)	0.284523
Lck (Y394)	0.122335
Lyn (Y397)	0.109361
MSK1/2 (S376/S360)	0.127896
p27 (T198)	0.0880445
p38a (T180/Y182)	0.0834106
p53 (S15)	-0.168675
p53 (S392)	0.124189
p53 (S46)	-0.111214
p70 S6 Kinase (T389)	0.26228
p70 S6 Kinase (T421/S424)	0.055607
PDGF Rß (Y751)	0.0750695
PLC-?1 (Y783)	0.101019
PRAS40 (T246)	-0.369787
PYK2 (Y402)	0.101019
RSK1/2/3 (S380/S386/S377)	0.202039
Src (Y419)	0.18443
STAT2 (Y689)	0.111214
STAT3 (S727)	0.0515292
STAT3 (Y705)	0.563485
STAT5a (Y694)	0.242817
STAT5a/b (Y694/Y699)	0.171455
STAT5b ( Y699)	0.163114
STAT6 (Y641)	0.18443
TOR (S2448)	0.089898
WNK1 (T60)	-0.265987
Yes (Y426)	0.164968
ß-Catenin	0.876738

## Sheet: Row data figure supplement 1
B	siCTRL_S1 1	siCTRL_S1 2	siCTRL_S1 3	siUBTD1_S1 1	siUBTD1_S1 2	siUBTD1_S1 3	siUBTD1_S2 1	siUBTD1_S2 2	siUBTD1_S2 3							F	SICTRL	siUBTD1
p-EGFR (Y1068)	100	100	100	120.732	134.029	122.304	113.014	123.003	113.085								1.9571	1.2204
p-EGFR (Y1086)	100	100	100	109.377	112.038	121.034	146.453	130.575	124.304								1.7196	1.4275
																	1.4785	1.1613
																	1.218	1.3498
																	1.4677	1.367
																	1.4207	1.6741
																	1.0645	1.4031
																	1.0257
D	siCTRL 1	siCTRL 2	siCTRL 3	siUBTD1 1	siUBTD1 2	siUBTD1 3											1.1906	1.2645
p-STAT	100	100	100	126.164	151.203	187.564											1.03	1.0738
p-ERK	100	100	100	146.253	135.328	173.512											1.2176	1.758
P-AKT Thr	100	100	100	194.106	203.409	143.092											1.1733	1.3115
P-AKT Ser	100	100	100	153.975	201.029	123.092											1.11	1.5421
																	1.1426	1.4429
																	1.124	1.3304
																	1.0511	1.1715
E	siCTRL_S1 1	siCTRL_S1 2	siCTRL_S1 3	siUBTD1_S1 1	siUBTD1_S1 2	siUBTD1_S1 3	siUBTD1_S2 1	siUBTD1_S2 2	siUBTD1_S2 3								1.1711	1.158
p-STAT	100	100	100	193.886	145.303	138.404	150.448	174.203	180.394								1.2255	1.3136
p-ERK	100	100	100	154.492	136.077	132.964	165.897	116.305	136.393								1.2575	1.5261
P-AKT Thr	100	100	100	136.032	156.039	182.304	154.148	197.294	164.202								1.0422	1.3994
P-AKT Ser	100	100	100	143.918	174.92	138.404	128.891	133.056	164.097								0.9827	1.3397
																	1.4199	1.2657
																	1.0782	1.2128
G	siCTRL 1	siCTRL 2	siCTRL 3	siCTRL 4	siCTRL 5	siUBTD1 1	siUBTD1 2	siUBTD1 3	siUBTD1 4	siUBTD1 5							1.189	1.27
BCL2	100	100	100	100	100	148	135	127	171	396							1.1834	1.4047
MMP2	100	100	100	100	100	168	185	177	191	225							1.3408	1.3596
MMP9	100	100	100	100	100	137	351	337	188	257							1.0059	1.433
HIF1a	100	100	100	100	100	202	153	219	201	178							1.2213	1.125
																	1.0476	1.5512
																	1.3877	1.1918
																	1.2445	1.3733
I																	1.5025	1.1809
siCTRL	siUBTD1																1.0736	1.0693
100	144																1.3831	1.3547
100	68																1.2945	1.0853
100	102																0.9998	1.1557
																	1.1341	0.9977
																	1.1258	1.3405
																	1.2254	1.3083
J	siCTRL	siUBTD1															1.1573	1.4097
	0.748166	0.601467															1.0381	1.2108
	1.18826	0.766748															1.4251	1.2107
	1.06357	0.922738															1.5288	1.1025
																	1.5224	1.0458
																	1.1795	1.4192
																	1.5067	1.247
																	1.1517	1.2782
																	1.3086	1.1036
K	siCTRL 1	siCTRL 2	siCTRL 3	siCTRL 4	siCTRL 5	siCTRL 6	siUBTD1 1	siUBTD1 2	siUBTD1 3	siUBTD1 4	siUBTD1 5	siUBTD1 6					1.3003	1.4342
UBTD1	100	100	100	100	100	100	6.04914	8.52722	5.03067	4.76404	8.62657	2.78086					1.2627	1.0206
EPGN	100	100	100	100	100	100	6.17187	42.6069	140.774	88.1685	142.366	167.638					1.1395	1.1613
BTC	100	100	100	100	100	100	93.2531	137.229	127.695	98.1041	160.946	129.224					1.1648	1.6637
EREG	100	100	100	100	100	100	97.0958	112.143	91.795	109.164	307.327	88.1275					1.3778	1.2681
TGFA	100	100	100	100	100	100	75.3463	72.3984	62.6193	74.7867	127.731	62.7202					1.7303	1.4093
AREG	100	100	100	100	100	100	76.2183	105.953	105.151	76.7879	113.968	149.841					1.1117	1.1479
HBEGF	100	100	100	100	100	100	80.4736	110.402	91.8906	96.7881	236.309	126.626					1.364	1.0456
																	1.3144	1.278
																	1.4655	1.2949
L	siCTRL 1	siCTRL 2	siCTRL 3	siUBTD1 1	siUBTD1 2	siUBTD1 3											1.2406	1.6048
TGF	0.990599	1.00526	1.00414	0.966854	1.04993	0.997507											1.1915
EPGN	0.725644	0.973711	1.30065	0.680096	1.15753	1.60967											1.2318	1.1561
epiregulin	0.746475	1.20141	1.05211	0.330024	0.533283	0.558929											1.2011	1.3657
BTC	0	-1.29825	3.29825	-1.06964	0.543712	3.27136											1.3289	1.0886
Amphi	0.331234	1.13709	1.53167	0.24202	1.36172	1.29787											1.0159	1.1668
																	1.1479	1.4831
																	1.1786	1.2402
																	1.0713	1.2515
																	1.0706	1.125
																	1.2683	1.2
																	1.0987	1.7785
																	1.3428	1.3009
																	0.9108	1.4503
																	1.0527
																	1.3352	1.1521
																	1.0768	1.086
																	1.0816	1.5025
																	1.1785	1.0103
																	1.2076	1.1754
																	1.5293	1.3088
																	1.4608	1.2138
																	1.1791	1.2322
																	1.0352	1.09
																	1.1191	1.1398
																	1.248	1.1741
																	1.2336	1.1904
																	1.1958	1.4651
																	1.0248	1.3829
																	1.1824	1.0636
																	1.2108	1.4396
																	1.1338	1.1585
																	1.0959	1.0412
																	1.2171	1.5347
																	1.0496	1.2128
																	1.3507	1.2861
																	1.302	1.3243
																	1.3037	1.1969
																	1.2759	1.8064
																	1.1159	1.3634
																	1.2284	1.3692
																	1.0018	1.0712
																	1.23	1.5482
																	1.0433	1.3925
																	1.1828	1.2411
																	1.2275	1.123
																	1.1896	1.1114
																	1.138	1.4823
																	1.3492	1.6
																	1.8118	1.3408
																	1.0928	1.3361
																	1.0262	1.2077
																	1.2075	1.4002
																	1.1934	1.1475
																	1.745	0.9894
																	1.2387	1.3333
																	1.1427	1.5001
																	1.2358	1.1819
																	1.9232	1.3279
																	1.0669	1.1936
																	1.3201	1.0479
																	1.0663	1.2742
																	1.0743	1.1859
																	1.0472	1.1506
																	1.3565	1.4264
																	1.2166	1.4625
																	0.9834	1.4315
																	1.7979	1.2421
																	1.2382	1.3261
																	1.2442	1.4441
																	1.0103	1.4529
																	1.2171	1.3043
																	1.1065	1.002
																	1.0635	1.1303
																	1.2894	1.4358
																	1.2417	1.2505
																	1.2808	1.1299
																	1.366	1.0515
																	1.1003	1.3287
																	1.2271	1.0218
																	1.1211	1.1692
																	1.208	1.0656
																	1.0916	1.1247
																	1.3117	1.4518
																	1.1074	1.0514
																	1.0953	1.5735
																	1.4236	1.2104
																	1.3469	1.2829
																	1.0488	1.2288
																	1.5282	1.1508
																	1.1395	1.2092
																	1.2261	1.2911
																	1.159	1.2175
																	1.1611	1.1211
																	1.2107	1.1281
																	1.0473	1.4678
																	1.54	1.2928
																	1.2347	1.1875
																	1.0891	1.1786
																	1.3574
																	1.085	1.215
																	1.1303	1.1033
																	1.4849	1.3581
																	1.4116	1.2326
																	0.9584	1.0515
																	1.306	1.1778
																	1.0524	1.248
																	1.286	1.3221
																	1.2644	1.3329
																	1.0136	1.3159
																	1.1756	1.3972
																	1.1116	1.0375
																	1.3834	1.1468
																	1.623	1.0555
																	1.0907	1.4095
																	1.1985	1.1585
																	1.1075	1.3134
																	0.9673	1.4192
																	1.4665	1.1337
																	1.1904	1.1556
																	1.3151	1.4114
																	1.4942	1.3516
																	1.7861	0.8978
																	1.2064	1.4116
																	1.0251	1.2665
																	0.9392	1.048
																	1.3586	1.1344
																	1.0861	0.9737
																	0.9458	1.5002
																	1.2991	1.0592
																	1.0481	1.1168
																	1.0462	1.1808
																	1.0927	1.136
																	1.1948	1.2688
																	1.4107	1.3725
																	1.3631	1.1376
																	1.2829	1.0672
																	1.0499	1.2466
																	1.189	1.2969
																	1.1361	1.1521
																	1.1799	1.1691
																	1.5431	1.2537
																	1.2296	1.1073
																	1.034	1.1001
																	1.6718	1.3423
																	1.2728	1.1982
																	1.0915	1.3415
																	1.5181	1.3517
																	1.1787	1.211
																	1.279	0.9506
																	1.4658	0.9657
																	1.299	1.2942
																	1.1759	1.0262
																	0.9971	1.182
																	1.2426	1.3292
																	1.0531	1.1879
																	1.2567	1.278
																	0.9715	1.452
																	1.0284	1.4984
																	1.3529	1.3126
																	1.1871	1.0797
																	1.0256	1.4466
																	1.2207	1.1049
																	1.1868	1.4991
																	0.9275	1.2655
																	1.0438	1.1326
																	1.0442	1.1198
																	1.0731	1.7878
																	1.0563	1.084
																	1.1655	1.0485
																	1.2386	1.5557
																	1.1084	1.3241
																	0.9599	1.1732
																	1.0892	1.2825
																	1.2176	1.1083
																	1.047	1.1005
																	1.2508	1.4701
																	1.2296	0.97
																	1.3416	0.9444
																	1.1041	1.217
																	1.2999	1.0931
																	1.2095	1.2967
																	1.1629	1.3874
																	1.2436	1.3254
																	1.4572	1.3371
																	1.4098	1.2122
																	1.1393	1.4973
																	1.1594	1.317
																	1.1584	1.0772
																	1.0794	1.2295
																	1.1735	1.2832
																	1.0447	1.5039
																	0.9497	1.0865
																	1.1565	1.9014
																	1.4464	1.4359
																	1.3122	1.1044
																	0.9889	1.1405
																	1.1217	1.4378
																	1.291	1.1101
																	1.2517	1.1791
																	1.1582	1.0043
																	0.99	1.0134
																	0.9246	1.0254
																	1.077	1.2638
																	1.1403	1.1848
																	1.1429	1.1607
																	1.2123	1.3816
																	1.1183	1.1445
																	1.2512	1.1755
																	1.3079	1.1746
																	1.6559	1.5249
																	1.3881	1.0639
																	1.1775	1.2837
																	1.2719	1.0354
																	1.3315	1.1377
																	1.2287	1.4684
																	1.1578	1.0966
																	1.4066	1.2486
																	1.3318	1.2213
																	1.3982	1.709
																	1.139	1.1862
																	1.3513	1.3273
																	1.0871	1.3078
																	1.769	1.3902
																	1.1636	1.2496
																	1.1323	1.3995
																	1.2377	1.3478
																	1.0817	1.2869
																	1.1944	1.0403
																	1.1875	1.3435
																	1.2392	1.4608
																	1.0829	1.2848
																	1.0459	1.2738
																	1.1809	1.2034
																	1.697	1.2361
																	1.3171	1.3754
																	0.9786	1.0788
																	1.0601	0.9594
																	1.3132	1.4813
																	1.1664	1.3428
																	1.3442	1.1923
																	1.2615	1.6762
																	1.6224	1.156
																	1.28	1.0688
																	1.2894	1.5171
																	1.0965	1.2531
																	1.2174	1.835
																	1.2125	1.2998
																	1.1335	1.306
																	1.5446	1.2721
																	1.6829	1.0693
																	1.1851	1.2475
																	1.2794	1.2128
																	1.3464	1.1893
																	1.0533	0.9607
																	1.6708	1.4414
																	1.1692	1.1739
																	1.1857	1.2418
																	1.1985	1.2832
																	1.1113	1.2003
																	1.1382	1.222
																	1.0375	1.3185
																	1.1511	1.4385
																	1.077	1.2612
																	1.0358	1.5307
																	1.0576	1.5146
																	1.2941	1.0071
																	1.0619	1.2654
																	1.1551	1.2479
																	1.2477	1.2381
																	1.3476	1.2222
																	1.0579	1.2147
																	0.9823	1.2203
																	1.1489	1.3589
																	1.243	1.3831
																	1.174	1.2759
																	1.1317	1.6302
																	1.2326	1.1192
																	1.2395	1.1543
																	1.215	1.2713
																	1.2304	1.1723
																	1.2715	1.2816
																	1.0375	1.2525
																	1.057	1.4444
																	1.0457	1.9475
																	1.2135	1.0156
																	1.6482	1.5105
																	1.5385	1.4878
																	1.2785	1.3633
																	1.1638	1.5082
																	1.3302	1.5852
																	1.274	1.424
																	1.3053	1.1191
																	1.2912	1.364
																	1.2866	1.2249
																	1.3397	1.4092
																	1.2761	1.2972
																	1.0642	1.3916
																	1.3374	1.7083
																	1.4515	1.6535
																	1.6236	2.1565
																	1.1901	1.1992
																	1.1036	1.1218
																	1.6047	1.5578
																	1.083	1.2157
																	1.2943	1.4845
																	1.1508	1.3281
																	1.1288	1.3714
																	1.1727	1.8705
																	1.156	1.1123
																	1.2324	1.1481
																	1.096	1.3614
																	1.2562	1.4931
																	1.1616	1.1544
																	1.1164	1.532
																	1.1274	1.5336
																	0.9973	1.2923
																	1.7397	1.2097
																		1.7536
																	1.2482	1.9312
																	1.1474	1.9996
																	1.1829	1.2493
																	1.132	1.7974
																	1.3083	1.9444
																	1.6055	1.4189
																	1.1513	1.4749
																	1.1066	1.7454
																	1.1655	1.5801
																	1.3461	1.2303
																	1.16	1.7099
																	1.0454	1.0799
																	1.1332	1.4456
																	1.2732	1.8334
																	1.2647	1.6546
																	1.3982	1.7298
																	1.1351	1.6585
																	1.1025	1.1814
																	1.1089	1.472
																	1.2039	1.4704
																	1.5202	1.192
																	1.0691	1.7075
																	1.1711
																	1.1845	1.4469
																	1.2198	1.9958
																	1.2911	2.8926
																	1.1013	1.919
																	1.4735	1.3361
																	1.2543	1.8588
																	1.1991	1.3739
																	1.4384	1.4892
																	1.1484	1.4854
																	1.1661	1.1978
																	1.1786	2.3
																	1.1922	1.2587
																	1.1077	2.3846
																	1.1892	2.0714
																	1.1116	1.473
																		1.3496
																		1.886
																		1.714
																		1.2078
																		1.8749
																		3.6207
																		3.523
																		1.5333
																		1.1791
																		1.3265
																		1.7991
																		1.2297
																		1.7153
																		2.1416
																		1.3294
																		1.9072
																		2.2287
																		1.1747
																		1.0891
																		1.703
																		1.18
																		1.2488
																		1.2502
																		1.2329
																		1.1941
																		1.4652
																		2.0403
																		1.8613
																		2.3288
																		1.3251
																		1.5641
																		2.0786
																		1.5676
																		1.478
																		1.5034
																		2.2385
																		2.3533
