# Supplementary material for: UBTD1 regulates ceramide balance and endolysosomal positioning to coordinate EGFR signaling
Source: eLife. 2021 Apr 22;10:e68348. doi: 10.7554/eLife.68348 (PMC8118655; doi:10.7554/eLife.68348)
Supplement: Figure 2—source data 2. [file elife-68348-fig2-data2.xlsx]

## Sheet: Row data Figure 2
A	siCTRL 1	siCTRL 2	siUBTD1 1	siUBTD1 2			B	siCTRL 1	siCTRL 2	siUBTD1 1	siUBTD1 2		C	siCTRL 1	siCTRL 2	siCTRL 3	siUBTD1 1	siUBTD1 2	siUBTD1 3		E
Cer(d18:1/16:0)	1.03912	0.960882	1.00198	1.00449			Cer(d18:1/16:0)	1.03912	0.960882	1.00198	1.00449		Ganglioside GA2 (d18:1/16:0)	5233	6570	7546	6484	8456	4762			siCTRL NT 1	siCTRL NT 2	siCTRL NT 3	siCTRL GM3 10uM 1	siCTRL GM3 10uM 2	siCTRL GM3 10uM 3	siCTRL GM3 20uM 1	siCTRL GM3 20uM 2	siCTRL GM3 20uM 3	siUBTD1 NT 1	siUBTD1 NT 2	siUBTD1 NT 3	siUBTD1 GM3 10uM 1	siUBTD1 GM3 10uM 2	siUBTD1 GM3 10uM 3	siUBTD1 GM3 20uM 1	siUBTD1 GM3 20uM 2	siUBTD1 GM3 20uM 3
Cer(d18:1/18:0)	1.0317	0.9683	1.0417	1.06098			Cer(d18:1/18:0)	1.0317	0.9683	1.0417	1.06098		Ganglioside GA2 (d18:1/22:0)	883	1132	1280	1092	1910	936		Y1068	100	100	100	142.083	102.309	98.2928	114.046	99.3927	87.22	178.512	154.202	135.291	52.6245	60.393	71.4946	38.3265	36.3923	38.3035
Cer(d36:1)	1.09707	0.902934	1.01922	1.19177			Cer(d36:1)	1.09707	0.902934	1.01922	1.19177		Ganglioside GM3 (d18:1/16:0)	5358	5010	4900	3433	3910	3045		Y1086	100	100	100	143.641	96.2021	101.433	83.1931	96.2201	98.3938	148.613	164.293	152.292	70.3368	69.3302	72.4849	52.0868	49.4903	50.3922
Cer(d18:1/20:0)	1.00268	0.997322	1.10804	1.10234			Cer(d18:1/20:0)	1.00268	0.997322	1.10804	1.10234		Ganglioside GA2 (d18:1/24:1(15Z))	3174	4471	4925	3503	5631	3236
Cer(d38:1)	1.07821	0.921789	1.14137	1.20019			Cer(d38:1)	1.07821	0.921789	1.14137	1.20019		Ganglioside GA2 (d18:1/24:0)	2333	3106	3686	2329	4176	2479
Cer(d18:2/22:0)	1.03791	0.962093	1.04016	1.09702			Cer(d18:2/22:0)	1.03791	0.962093	1.04016	1.09702		Ganglioside GM3 (d18:1/24:1(15Z))	788	768	799	584	943	662
Cer(d18:1/22:0)	1.0119	0.988103	0.918789	0.983475			Cer(d18:1/22:0)	1.0119	0.988103	0.918789	0.983475		Ganglioside GM3 (d18:1/24:0)	865	862	917	593	904	765		F
Cer(d18:0/22:0)	0.996773	1.00323	0.88539	0.83756			Cer(d18:0/22:0)	0.996773	1.00323	0.88539	0.83756		Ganglioside GA1(d18:1/24:1(15Z))	840	1143	1301	1142	1972	1010		Hours	siCTRL NT 1	siCTRL NT 2	siCTRL NT 3	siCTRL GM3 500nM 1	siCTRL GM3 500nM 2	siCTRL GM3 500nM 3	siUBTD1 NT 1	siUBTD1 NT 2	siUBTD1 NT 3	siUBTD1 GM3 500nM 1	siUBTD1 GM3 500nM 2	siUBTD1 GM3 500nM 3
Cer(d18:2/24:1)	1.02173	0.978271	1.00117	1.07954			Cer(d18:2/24:1)	1.02173	0.978271	1.00117	1.07954		Ganglioside GA1(d18:1/24:0)	930	1169	1382	1152	2007	1144		40	1.7	1.8	1.8	1.7	1.9	1.9	1.8	1.9	1.9	1.8	1.7	1.8
Cer(d18:1/24:0)	0.998807	1.00119	0.863871	0.821705			Cer(d18:1/24:0)	0.998807	1.00119	0.863871	0.821705		Ganglioside GM2 (d18:1/16:0)	9406	8856	8505	4705	5426	4369		42	1.8	1.9	1.9	1.8	1.9	1.9	1.8	2	1.9	1.8	1.8	1.9
Cer(d18:0/24:0)	0.974213	1.02579	0.707787	0.724939			Cer(d18:0/24:0)	0.974213	1.02579	0.707787	0.724939		Ganglioside GM2 (d18:1/20:0)	1125	1036	769	612	724	596		44	1.8	1.9	2	1.8	2	2	1.9	2.1	2	1.9	1.8	1.9
CerG1(d18:1/14:0)	1.00453	0.995469	1.02636	1.05091			CerG1(d18:1/14:0)	1.00453	0.995469	1.02636	1.05091		Ganglioside GM2 (d18:1/22:0)	1175	1009	1007	695	1064	689		46	1.9	2	2.1	1.9	2	2.1	2	2.1	2.1	1.9	1.9	2
Cer(d18:2/26:1)	1.01152	0.988483	1.05596	1.01583			Cer(d18:2/26:1)	1.01152	0.988483	1.05596	1.01583		Ganglioside GM2 (d18:1/24:1(15Z))	1795	1853	1962	1050	1842	1318		48	1.9	2	2.1	1.9	2.1	2.1	2.1	2.2	2.1	2	1.9	2.1
Cer(d18:1/26:1)	0.996501	1.0035	0.80607	0.83691			Cer(d18:1/26:1)	0.996501	1.0035	0.80607	0.83691		Ganglioside GM2 (d18:1/24:0)	1706	1663	1793	897	1587	1238		50	1.9	2.1	2.1	2	2.2	2.2	2.2	2.3	2.2	2.1	2	2.1
Cer(d18:1/26:0)	1.00636	0.993641	0.649242	0.719215			Cer(d18:1/26:0)	1.00636	0.993641	0.649242	0.719215		Ganglioside GM1 (18:1/16:0)	1262	1167	1168	735	898	683		52	2	2.1	2.2	2	2.3	2.2	2.2	2.4	2.3	2.1	2.1	2.2
CerG1(d18:1/16:0)	0.989074	1.01093	1.0601	1.12506			CerG1(d18:1/16:0)	0.989074	1.01093	1.0601	1.12506										54	2	2.2	2.2	2.1	2.3	2.3	2.3	2.5	2.3	2.2	2.1	2.3
CerG1(d18:1/18:0)	1.01791	0.982092	1.1734	1.27876			CerG1(d18:1/18:0)	1.01791	0.982092	1.1734	1.27876		D	siCTRL 1	siCTRL 2	siCTRL 3	siUBTD1 1	siUBTD1 2	siUBTD1 3		56	2.1	2.2	2.4	2.2	2.4	2.4	2.4	2.6	2.4	2.3	2.2	2.3
CerG1(d40:1)	0.984173	1.01583	1.01727	1.05536			CerG1(d40:1)	0.984173	1.01583	1.01727	1.05536		Ganglioside GM3 (d18:1/16:0)	24404.5	23370.8	26535.2	17875.1	15277.6	19039.4		58	2.2	2.3	2.4	2.2	2.5	2.4	2.5	2.7	2.5	2.3	2.3	2.4
CerG1(d42:4)	1.04117	0.958834	1.22955	1.40506			CerG1(d42:4)	1.04117	0.958834	1.22955	1.40506		Ganglioside GM3 (d18:1/24:1(15Z))	5545.82	5430.1	6534.08	4563.44	5696.94	5990		60	2.2	2.3	2.5	2.3	2.6	2.5	2.6	2.8	2.5	2.4	2.3	2.4
CerG1(d18:2/24:0)	0.963393	1.03661	1.18709	1.18623			CerG1(d18:2/24:0)	0.963393	1.03661	1.18709	1.18623		Ganglioside GM3 (d18:1/24:0)	5738.47	5240.67	6323.37	4122.7	5246.9	6882.79		62	2.3	2.4	2.5	2.4	2.6	2.5	2.7	3	2.6	2.4	2.4	2.5
CerG1(d18:0/24:1)	1.0092	0.990799	1.15424	1.12768			CerG1(d18:0/24:1)	1.0092	0.990799	1.15424	1.12768		Ganglioside GM2 (d18:1/16:0)	104652	102419	118881	71061.1	65330.6	80428.6
CerG1(d42:1)	0.979006	1.02099	0.97948	0.922957			CerG1(d42:1)	0.979006	1.02099	0.97948	0.922957		Ganglioside GM2 (d18:1/18:0)	9637.93	9447.9	9478.29	6736.4	6892.82	6696.08
CerG1(d44:2)	0.982039	1.01796	1.1286	1.14331			CerG1(d44:2)	0.982039	1.01796	1.1286	1.14331		Ganglioside GM2 (d18:1/22:0)	17411	16327.5	18402.6	11839.6	14866.3	15804.6
CerG1(d18:1/26:0)	0.967546	1.03245	0.717553	0.73028			CerG1(d18:1/26:0)	0.967546	1.03245	0.717553	0.73028		Ganglioside GM2 (d18:1/24:1(15Z))	33341.8	33240.4	39435.5	22413.9	29607.9	34656.6
CerG2(d18:1/22:0)	1.00218	0.997825	0.954499	0.929685			CerG2(d18:1/22:0)	1.00218	0.997825	0.954499	0.929685		Ganglioside GM2 (d18:1/24:0)	31974.8	32574.8	39669.8	21261.2	28358.8	34463.5
CerG2(d18:1/24:1)	1.00876	0.991244	1.03265	0.92697			CerG2(d18:1/24:1)	1.00876	0.991244	1.03265	0.92697		Ganglioside GM2 (d18:1/25:0)	6877.84	6891.44	8036.11	4993	5804.54	6876.66
CerG2(d18:1/24:0)	1.00796	0.992036	0.956997	0.899478			CerG2(d18:1/24:0)	1.00796	0.992036	0.956997	0.899478		Ganglioside GM1 (18:1/16:0)	19449.8	18015.9	20999.5	12147.2	11728.7	14218.2
CerG2(d18:1/26:1)	0.978435	1.02156	0.887875	0.828122			CerG2(d18:1/26:1)	0.978435	1.02156	0.887875	0.828122		Ganglioside GM1 (18:1/22:0)	3837.35	3219.87	3719.67	2395.74	3256.52	3285.87
CerG2(d18:1/26:0)	0.950524	1.04948	0.799482	0.706441			CerG2(d18:1/26:0)	0.950524	1.04948	0.799482	0.706441		Ganglioside GM1 (d18:1/24:1(15Z))	7774.27	7503.06	8810.55	5055.81	6827.06	7727.52
CerG3(d18:1/22:0)	1.10375	0.896245	0.809369	0.906986			CerG3(d18:1/22:0)	1.10375	0.896245	0.809369	0.906986		Ganglioside GM1 (d18:1/24:0)	8172.4	7266.43	8992.28	4990.92	6942.12	8017.25
CerG3(d18:1/24:1)	1.06452	0.935484	1.00697	0.972942			CerG3(d18:1/24:1)	1.06452	0.935484	1.00697	0.972942
CerG3(d18:1/24:0)	1.06134	0.938661	1.00739	0.881704			CerG3(d18:1/24:0)	1.06134	0.938661	1.00739	0.881704
ChE(18:2)	1.00655815	0.99344185	1.09477129	1.18092647
ChE(18:1)	0.99058466	1.00941534	1.09784187	1.10865373
ChE(20:5)	0.9579646	1.0420354	0.95801022	1.02517909
ChE(20:4)	0.99823408	1.00176592	1.02179989	1.13506142
ChE(20:3)	0.99350996	1.00649004	0.9228187	0.89483796
ChE(20:2)	1.01332899	0.98667101	1.10257036	1.0533944
ChE(20:1)	1.01542828	0.98457172	1.18503293	1.08760982
ChE(22:6)	0.99587249	1.00412751	0.99093106	1.0298874
ChE(22:5)	1.01012277	0.98987723	1.05614832	1.08538288
ChE(22:3)	1.0541175	0.9458825	1.06748877	1.02071067
ChE(22:2)	1.02999351	0.97000649	1.04981502	1.00315201
ChE(24:6)	1.02121076	0.97878924	1.0774583	1.07648043
ChE(24:5)	1.00870202	0.99129798	0.99742809	1.0507163
ChE(24:4)	1.04005619	0.95994381	1.02560469	0.98396831
ChE(24:3)	1.00334246	0.99665754	1.0364969	1.00716031
ChE(24:2)	1.01488664	0.98511336	1.00502679	0.93556055
ChE(24:1)	1.00773382	0.99226618	0.96980225	0.94879738
ChE(26:6)	0.99808307	1.00191693	1.05273335	1.15285064
ChE(26:4)	0.99177802	1.00822198	0.97155437	0.9319593
ChE(26:3)	0.99005237	1.00994763	0.94762243	0.93858776
ChE(26:2)	0.99526105	1.00473895	0.94188302	0.90568896
ChE(26:1)	0.95766582	1.04233418	0.91115026	0.9429921
ChE(28:6)	0.9846572	1.0153428	1.02644394	1.13630613
ChE(28:4)	0.98168421	1.01831579	0.94556181	0.90111612
ChE(28:3)	0.97838045	1.02161955	0.9410919	0.93175052
ChE(28:2)	1.00077144	0.99922856	0.88557652	0.93180511
ChE(30:4)	0.99696594	1.00303406	0.76553295	0.77238301
ChE(32:4)	0.98053314	1.01946686	0.60862135	0.58961713
DG(16:0/14:0)	1.00409653	0.99590347	1.03907911	1.0788041
DG(18:1/14:0)	0.98910799	1.01089201	1.01213965	1.09433268
DG(16:0/16:0)	1.00633193	0.99366807	0.98924661	1.0036698
DG(16:1/18:1)	1.00883012	0.99116988	0.99773453	0.97189809
DG(16:0/18:1)	0.98518685	1.01481315	0.98826667	0.99497476
DG(18:0/16:0)	1.02390832	0.97609168	0.9294502	0.96881031
DG(16:0/20:3)	1.03247365	0.96752635	1.00110917	0.93602545
DG(18:1/18:1)	0.98995046	1.01004954	1.02724498	1.02477604
DG(16:0/20:1)	0.99706559	1.00293441	0.98617642	0.97679525
DG(18:0/18:0)	1.03873009	0.96126991	0.95515684	1.11669063
DG(18:1/20:4)	1.02222399	0.97777601	1.00711672	1.06406146
DG(18:0/20:4)	1.03316505	0.96683495	1.18302662	1.34359823
DG(18:0/20:3)	1.03072783	0.96927217	1.13213247	1.15673016
DG(20:1/18:1)	1.0177565	0.9822435	1.02098718	0.93652097
DG(16:0/22:1)	1.06022154	0.93977846	0.98902969	0.971532
DG(18:1/22:6)	1.0204896	0.9795104	1.00284591	1.03760323
DG(18:1/22:3)	0.98649952	1.01350048	1.02116365	0.91035122
DG(18:0/22:3)	1.03319292	0.96680708	1.13315501	1.21314804
DG(18:1/22:2)	1.01149514	0.98850486	0.99477409	0.98448332
DG(18:0/22:2)	0.98919735	1.01080265	0.93407865	0.88419766
DG(16:0/24:1)	0.97669973	1.02330027	0.83087896	0.79212151
DG(16:0/24:0)	1.00923378	0.99076622	0.90418501	0.90343815
DG(18:1/24:1)	0.97035435	1.02964565	0.84506921	0.76860917
DG(26:1/16:0)	1.00465393	0.99534607	0.76919334	0.73906423
DG(26:0/16:0)	0.97241368	1.02758632	0.76856163	0.77670485
DG(26:1/18:1)	0.97509168	1.02490832	0.75753839	0.70478924
DG(28:1/16:0)	0.98423209	1.01576791	0.73319386	0.73008721
DG(28:1/18:1)	0.99149156	1.00850844	0.77473677	0.77011109
LPC(16:0)	1.00171264	0.99828736	1.00988567	1.0180839
LPC(18:1)	0.99599836	1.00400164	1.01674196	0.98593684
LPC(18:0)	1.01635703	0.98364297	1.03232087	1.05930606
LPC(20:4)	0.98972589	1.01027411	0.89096477	1.01572179
LPC(20:3)	1.0088698	0.9911302	0.93953497	0.89158199
LPC(20:2)	0.99380484	1.00619516	0.99942551	0.9772062
LPC(22:4)	1.01610928	0.98389072	0.91987408	0.80940795
LPC(22:1)	0.99520609	1.00479391	1.02753374	1.05114445
LPC(24:1)	1.00466348	0.99533652	1.01467044	1.02837772
LPC(26:1)	0.97412356	1.02587644	0.85143243	0.87502347
MG(32:1)	1.01463236	0.98536764	1.06305606	1.13777285
MG(32:0)	1.00845978	0.99154022	1.0320606	1.06847871
MG(34:1)	1.00716252	0.99283748	1.05332571	1.03945076
MG(34:0)	0.98254049	1.01745951	0.9073172	0.90212443
MG(36:2)	1.01263131	0.98736869	1.06837743	1.0512568
MG(36:1)	0.99098586	1.00901414	0.93438996	0.92737625
MG(38:2)	0.98977317	1.01022683	0.89401996	0.80860667
PC(26:0)	0.99655767	1.00344233	1.11926957	0.99796166
PC(14:0/14:0)	0.98021396	1.01978604	1.04482234	0.93362835
PC(16:1/14:0)	0.98959279	1.01040721	1.05327242	0.94273182
PC(16:0/14:0)	1.02233845	0.97766155	1.048997	1.00222412
PC(16:1/16:1)	0.99897955	1.00102045	1.01056324	0.92135552
PC(16:0/16:1)	1.00111647	0.99888353	1.01765441	1.01296041
PC(16:0/16:0)	0.99661918	1.00338082	0.99882463	1.01129491
PC(34:4)	0.99159934	1.00840066	0.94248021	0.84003363
PC(16:1/18:2)	1.00324664	0.99675336	0.99705518	0.91385168
PC(16:1/18:1)	0.99646169	1.00353831	0.97789143	0.96026434
PC(16:0/18:1)	0.99313027	1.00686973	1.01297457	1.06200029
PC(18:0/16:0)	0.99912323	1.00087677	0.89280853	0.87540303
PC(36:6)	0.97936099	1.02063901	0.96342048	0.81223137
PC(18:4/18:1)	0.99781735	1.00218265	0.92722084	0.86136131
PC(16:0/20:4)	1.00496252	0.99503748	0.9671719	0.94754705
PC(18:1/18:2)	0.99000831	1.00999169	0.99393851	0.97114168
PC(18:1/18:1)	1.0123802	0.9876198	0.98394076	1.02708647
PC(18:0/18:1)	0.99268937	1.00731063	1.01620696	1.00385766
PC(16:1/22:6)	0.99145221	1.00854779	0.89029417	0.78457351
PC(18:3/20:3)	1.0232793	0.9767207	0.98649602	0.95885893
PC(18:1/20:4)	1.01112218	0.98887782	0.98125654	0.99722071
PC(18:1/20:3)	1.01513107	0.98486893	1.00145792	0.93130958
PC(18:1/20:2)	1.01577825	0.98422175	1.02281524	0.98817247
PC(20:1/18:1)	1.01107363	0.98892637	1.02252937	0.98122835
PC(38:1)	1.00268632	0.99731368	0.94861162	0.91974373
PC(40:8)	1.00311355	0.99688645	0.87581395	0.77301904
PC(18:1/22:6)	1.01161312	0.98838688	0.99056472	0.94260291
PC(40:4)	1.02138152	0.97861848	1.01898923	0.95778298
PC(40:3)	0.99843316	1.00156684	0.98780702	0.92509997
PC(18:1/22:1)	0.99102181	1.00897819	0.91773998	0.87181833
PC(40:1)	0.97891878	1.02108122	0.84234287	0.80229494
PC(42:9)	1.01569206	0.98430794	0.96219923	0.86639278
PC(42:8)	1.01687725	0.98312275	1.04265968	0.99518779
PC(42:4)	1.00478557	0.99521443	0.92459918	0.85506431
PC(42:3)	0.99692736	1.00307264	0.92102959	0.85446993
PC(18:1/24:1)	0.98325412	1.01674588	0.82535692	0.77901291
PC(18:1/24:0)	0.98249151	1.01750849	0.76371219	0.71697083
PC(42:0)	0.97883892	1.02116108	0.68334193	0.62826608
PC(44:5)	1.00104626	0.99895374	0.86300489	0.81332696
PC(26:2/18:1)	0.98121281	1.01878719	0.83531877	0.7835719
PC(26:1/18:1)	0.98644916	1.01355084	0.78732577	0.7242669
PC(26:0/18:1)	0.98139176	1.01860824	0.72726514	0.70225584
PC(46:3)	0.97280843	1.02719157	0.78852392	0.70628568
PC(28:1/18:1)	0.96399473	1.03600527	0.75052014	0.71293348
PC(46:1)	0.97018955	1.02981045	0.64191935	0.61128846
PE(16:0/14:0)	0.99352595	1.00647405	0.83096884	0.79164885
PE(16:0/16:1)	1.00248102	0.99751898	0.94467927	0.94595288
PE(16:1/18:1)	0.99128964	1.00871036	0.9794238	0.96093615
PE(16:0/18:1)	1.05950007	0.94049993	1.01295082	0.95965908
PE(16:0/18:1)	1.01565957	0.98434043	0.9368431	0.943181
PE(16:0/20:4)	1.06026643	0.93973357	0.98145108	0.95187902
PE(18:1/18:1)	0.99031791	1.00968209	1.09077997	1.12791253
PE(18:0/18:1)	0.99401017	1.00598983	0.90434554	0.88152559
PE(18:0/18:0)	0.9968305	1.0031695	1.04928688	0.97586699
PE(18:1/20:3)	1.0384674	0.9615326	0.96013522	0.96449096
PE(18:0/20:3)	1.00019657	0.99980343	1.05144022	0.98164805
PE(18:1/22:6)	1.04195442	0.95804558	1.13034331	1.0703942
PE(18:0/22:6)	1.01875836	0.98124164	0.96220964	0.97011324
PE(42:2)	1.02786914	0.97213086	0.98879718	1.07008753
PE(18:1/24:0)	0.98095805	1.01904195	0.70168012	0.63479417
PG(16:0/18:1)	0.99322408	1.00677592	1.006761	1.0588966
PG(18:1/18:1)	0.9884444	1.0115556	0.98566906	0.97261913
PG(18:1/20:4)	0.99010743	1.00989257	0.99575023	0.94326355
PG(18:1/20:2)	1.05809772	0.94190228	1.1492132	1.08565235
PG(18:1/22:6)	1.00929681	0.99070319	0.94965588	0.92012766
PG(22:6/22:6)	1.07357106	0.92642894	1.00799886	1.00221102
PI(16:1/18:1)	0.96066179	1.03933821	0.845545	0.87526722
PI(18:0/16:0)	1.00782086	0.99217914	0.96327875	0.92851212
PI(16:0/20:4)	0.98761413	1.01238587	1.07408294	0.99745033
PI(18:1/18:2)	0.94094954	1.05905046	0.97592988	0.96801315
PI(18:1/18:1)	0.95557068	1.04442932	0.91789901	0.94192232
PI(18:0/18:1)	0.98726462	1.01273538	0.91988142	1.09151698
PI(18:0/18:0)	1.02245422	0.97754578	1.06208523	1.00938749
PI(18:1/20:4)	0.98886007	1.01113993	0.97944492	0.94133909
PI(18:0/20:3)	1.02104252	0.97895748	1.03549299	1.02893344
PI(20:2/20:3)	1.00537706	0.99462294	1.01771529	1.010627
PS(16:0/16:1)	0.94733814	1.05266186	0.96863956	0.93972327
PS(16:1/18:1)	0.95199653	1.04800347	0.96875486	0.92758789
PS(16:0/18:1)	0.98697081	1.01302919	0.94642805	0.92802335
PS(18:1/18:1)	0.97586836	1.02413164	1.03514913	1.01684413
PS(18:0/18:1)	1.01109042	0.98890958	1.01351304	1.02340837
PS(18:1/20:3)	1.00378918	0.99621082	1.05789897	0.92014732
PS(18:0/20:3)	1.01619453	0.98380547	0.98911636	1.00511483
PS(18:0/20:2)	0.98942569	1.01057431	1.07261933	1.10425779
PS(18:1/22:6)	1.0139294	0.9860706	1.04322414	0.93147381
PS(18:0/22:6)	1.03025724	0.96974276	0.97975194	0.97590675
PS(18:0/22:5)	0.99712188	1.00287812	1.01546322	1.07734398
PS(18:0/22:2)	0.97570962	1.02429038	0.98546275	0.98499248
PS(18:1/22:0)	0.99217207	1.00782793	0.90505244	0.89029557
PS(18:1/24:1)	1.00547281	0.99452719	0.96881763	0.93720227
PS(18:1/24:0)	1.01444068	0.98555932	0.88764159	0.8626501
SM(d32:1)	0.97737561	1.02262439	0.89285871	0.78574756
SM(d34:4)	1.09215359	0.90784641	1.49758818	1.59533681
SM(d34:1)	1.0106393	0.9893607	1.02188501	1.03543942
SM(d34:0)	1.0234141	0.9765859	1.06524195	1.10532147
SM(d36:5)	1.0675733	0.9324267	1.5072057	1.74090771
SM(d36:2)	1.04234923	0.95765077	1.04597113	0.9993648
SM(d36:1)	1.04796282	0.95203718	1.11901516	1.16098694
SM(d36:0)	1.04206176	0.95793824	1.10558652	1.11189353
SM(d38:1)	1.03724547	0.96275453	1.04274756	1.00720519
SM(d40:2)	0.99862939	1.00137061	1.09840212	1.08263178
SM(d40:1)	0.99695631	1.00304369	0.93016778	0.914385
SM(d40:0)	0.99085317	1.00914683	0.90388872	0.88326006
SM(d18:1/24:3)	1.03077461	0.96922539	1.16925927	1.331886
SM(d42:3)	0.98528997	1.01471003	1.05849557	1.05950421
SM(d18:1/24:1)	0.99024567	1.00975433	0.98711651	0.9686862
SM(d18:2/26:3)	1.02166151	0.97833849	1.30612594	1.57566658
SM(d18:1/26:3)	1.00251286	0.99748714	1.110742	1.24891412
SM(d44:3)	0.98378755	1.01621245	0.95482309	0.93570561
SM(d12:0/32:2)	0.97864844	1.02135156	0.89860071	0.86790311
SM(d44:1)	0.9874275	1.0125725	0.77257928	0.73888778
SM(d46:5)	0.98742724	1.01257276	1.00396523	1.06963611
SM(d46:4)	0.99740239	1.00259761	0.80422634	0.77841693
TG(16:0/12:0/14:0)	1.04236931	0.95763069	0.96446561	1.03627359
TG(16:1/14:0/14:0)	1.018851	0.981149	0.94942693	0.92680763
TG(16:0/14:0/14:0)	1.02582753	0.97417247	0.90048319	0.89919815
TG(16:1/12:0/18:1)	1.01611019	0.98388981	0.95185602	0.90789097
TG(16:0/14:0/16:1)	1.01259078	0.98740922	0.94512046	0.87199951
TG(16:0/14:0/16:0)	1.01232365	0.98767635	0.94562323	1.02083165
TG(16:1/16:1/16:1)	1.0234768	0.9765232	0.94952699	0.87686611
TG(16:0/16:1/16:1)	1.01078585	0.98921415	0.97328426	0.91361036
TG(16:0/16:0/16:1)	0.99579827	1.00420173	1.00005309	1.01554518
TG(16:0/16:0/16:0)	1.01729508	0.98270492	0.97341383	1.04445808
TG(16:1/16:1/18:1)	1.0014244	0.9985756	0.94952171	0.86325517
TG(16:0/16:1/18:1)	1.00255137	0.99744863	1.00932122	1.00351418
TG(16:0/16:0/18:1)	0.99443858	1.00556142	1.00911571	1.05843962
TG(18:0/16:0/16:0)	1.01453698	0.98546302	0.96128931	1.05324692
TG(16:0/14:0/22:6)	1.05547664	0.94452336	0.9394949	0.84737998
TG(16:1/18:2/18:2)	1.03518795	0.96481205	0.97175477	0.88049322
TG(16:1/18:1/18:2)	1.02220997	0.97779003	0.97407499	0.88359323
TG(16:1/18:1/18:1)	1.00215428	0.99784572	0.999113	0.9571272
TG(16:0/18:1/18:1)	0.99212608	1.00787392	1.00708386	1.02913669
TG(18:0/16:0/18:1)	1.00103383	0.99896617	0.97581262	1.01695001
TG(18:0/16:0/18:0)	1.01097316	0.98902684	0.92705452	1.01862509
TG(18:1/14:0/22:6)	1.06082518	0.93917482	0.90406441	0.780816
TG(16:0/18:1/20:5)	1.00201335	0.99798665	1.00829379	1.14796309
TG(16:1/18:1/20:4)	1.04884153	0.95115847	0.92914118	0.85282407
TG(16:1/18:1/20:3)	1.02089528	0.97910472	0.96025854	0.88525926
TG(16:0/18:1/20:3)	0.99810706	1.00189294	0.96763635	0.88230989
TG(18:1/18:1/18:2)	1.00449385	0.99550615	1.01840293	0.95534865
TG(18:1/18:1/18:1)	0.99717928	1.00282072	1.0161251	1.00830419
TG(16:0/18:1/20:1)	0.99682846	1.00317154	1.01695122	1.03487024
TG(18:0/16:0/20:1)	0.99823025	1.00176975	0.95741542	1.0060284
TG(18:0/18:0/18:0)	1.02708732	0.97291268	0.96891893	1.06196148
TG(16:1/18:1/22:6)	1.05340625	0.94659375	0.94154996	0.80881828
TG(16:0/18:1/22:6)	1.05624794	0.94375206	0.95679192	0.83922493
TG(16:1/18:1/22:5)	1.04185991	0.95814009	0.98140219	0.84275477
TG(18:0/16:0/22:6)	1.04115747	0.95884253	0.90912339	0.87295284
TG(18:1/18:1/20:4)	1.04784789	0.95215211	0.98486625	1.03619953
TG(18:1/18:1/20:3)	1.02458669	0.97541331	0.99659513	0.92020772
TG(18:1/18:1/20:2)	1.00790016	0.99209984	1.01980555	0.96476429
TG(20:1/18:1/18:1)	1.00309311	0.99690689	1.0223748	0.97404686
TG(18:0/18:1/20:1)	0.99843955	1.00156045	0.99360701	0.96780102
TG(16:0/16:0/24:1)	0.98724819	1.01275181	0.91959224	0.95320011
TG(16:0/16:0/24:0)	1.01179761	0.98820239	0.87380756	0.92252157
TG(18:1/18:1/22:6)	1.12409491	0.87590509	1.02812357	0.785707
TG(18:1/18:1/22:3)	1.02051392	0.97948608	1.01837187	0.92966326
TG(20:1/18:1/20:1)	0.99925598	1.00074402	1.02828145	0.98446619
TG(16:0/18:1/24:1)	0.98748687	1.01251313	1.00841147	0.99109716
TG(16:0/18:1/24:0)	1.00709162	0.99290838	0.93967781	0.97498533
TG(26:0/16:0/16:0)	1.00146123	0.99853877	0.88691165	0.97289392
TG(20:1/18:1/22:6)	1.026186	0.973814	1.08432489	0.99723289
TG(18:1/20:2/22:3)	1.02160105	0.97839895	1.03219837	0.93015423
TG(20:1/18:1/22:3)	1.02301991	0.97698009	1.05097836	0.97288501
TG(18:1/18:1/24:2)	0.99907372	1.00092628	1.02136103	0.95625264
TG(18:1/18:1/24:1)	0.98467167	1.01532833	0.99037862	0.96513762
TG(26:1/16:0/18:1)	0.98874648	1.01125352	1.00892616	1.02623167
TG(26:0/16:0/18:1)	0.99550012	1.00449988	0.9567658	1.01412621
TG(26:0/16:0/18:0)	0.99774028	1.00225972	0.85561455	0.98647819
TG(18:1/22:3/22:3)	1.03198814	0.96801186	1.05759453	0.97948837
TG(26:4/18:1/18:1)	1.00815247	0.99184753	1.02840703	0.93865554
TG(26:3/18:1/18:1)	1.00527657	0.99472343	1.01869064	0.95367143
TG(26:2/18:1/18:1)	0.98842536	1.01157464	1.02703526	0.95729442
TG(26:1/18:1/18:1)	0.99075786	1.00924214	1.00640769	0.98788545
TG(26:1/18:0/18:1)	0.9889424	1.0110576	0.97556676	0.99251401
TG(26:0/18:0/18:1)	0.99801225	1.00198775	0.86115542	0.94234799
TG(28:0/16:0/18:0)	0.97393046	1.02606954	0.82118752	0.94437632
TG(28:4/18:1/18:1)	1.00767687	0.99232313	1.0094783	0.89794677
TG(26:2/18:1/20:1)	0.98974168	1.01025832	0.98808144	0.9300131
TG(26:1/18:1/20:1)	0.98813681	1.01186319	0.95704559	0.93032638
TG(26:0/18:1/20:1)	0.99517996	1.00482004	0.90029712	0.92765668
TG(30:0/16:0/18:1)	0.97740353	1.02259647	0.85041123	0.92646831
TG(26:2/18:1/22:3)	1.00182527	0.99817473	0.95274476	0.83364735
TG(26:1/18:1/22:2)	0.98609082	1.01390918	0.91354535	0.8351798
TG(30:1/18:1/18:1)	0.97923525	1.02076475	0.87614343	0.85852428
TG(30:0/18:1/18:1)	0.98147672	1.01852328	0.85127032	0.86664983
TG(26:0/16:0/24:1)	0.98308818	1.01691182	0.84590128	0.89889816
TG(26:1/18:1/24:2)	0.98503573	1.01496427	0.87243199	0.83351617
TG(26:1/18:1/24:1)	0.97501029	1.02498971	0.82729917	0.8506208
TG(26:0/18:1/24:1)	0.97063168	1.02936832	0.87314102	0.88111076
TG(26:0/18:1/24:0)	0.98654324	1.01345676	0.81689214	0.91476873
TG(28:1/18:1/24:2)	0.99268445	1.00731555	0.84826614	0.82657728
TG(26:1/20:1/24:1)	0.95790342	1.04209658	0.86345352	0.84734894
TG(28:1/18:1/24:0)	0.98676823	1.01323177	0.83363865	0.85892678
ZyE(26:1)	1.00170524	0.99829476	0.98193911	0.97467614
ZyE(26:2)	1.00245579	0.99754421	1.00298797	1.00834014
ZyE(26:3)	0.99810349	1.00189651	1.01557905	1.00530618
ZyE(26:4)	1.00538808	0.99461192	1.06218055	1.07622801
ZyE(28:4)	0.99935722	1.00064278	0.99696003	1.0685771
ZyE(30:4)	1.01510533	0.85608542	0.89315049	0.98489467

## Sheet: Row data figure supplement 1
A	TG	DG	MG	Cer	SM	LPC	ChE	ZyE	PC	PE	PS	PI	PG
siCTRL 1	78.5847	97.1901	93.1877	92.3532	90.63	70.2179	74.4858	67.7804	101.278	92.9709	67.8825	79.9315	80.6588
siCTRL 2	118.43	100.976	104.242	104.077	103.505	120.014	115.675	119.882	99.3013	104.576	113.874	113.75	121.719
siCTRL 3	102.985	101.834	102.571	103.57	105.865	109.768	109.84	112.338	99.421	102.453	118.244	106.319	97.6218
siUBTD1 1	96.2841	98.2291	82.2502	68.802	90.5212	154.745	119.908	113.641	99.3907	97.2827	127.906	133.409	95.3996
siUBTD1 2	65.9623	90.5737	142.653	69.3082	90.2642	76.286	78.8108	61.2995	101.17	90.2714	82.1512	80.7859	69.6679
siUBTD1 3	80.2994	90.2732	68.8745	67.7503	90.7224	50.8066	98.2057	81.5514	101.613	90.1697	66.7649	62.7833	69.6297
E	siCTRL 1	siCTRL 2	siCTRL 3	siUBTD1 1	siUBTD1 2	siUBTD1 3	siASAH1 1	siASAH1 2	siASAH1 3	siASAH1 + siUBTD1 1	siASAH1 + siUBTD1 2	siASAH1 + siUBTD1 3
p-EGFR (Y1068)	100	100	100	121.482	134.202	129.874	80.2895	98.2839	94.292	92.1412	89.3865	97.4903
p-EGFR (Y1086)	100	100	100	145.443	126.403	136.947	105.768	98.9213	90.483	77.2637	87.3202	80.4933
P-STAT	100	100	100	168.771	144.348	147.494	108.342	100.384	99.7608	90.8705	88.404	101.395
