# Supplementary material for: UBTD1 regulates ceramide balance and endolysosomal positioning to coordinate EGFR signaling
Source: eLife. 2021 Apr 22;10:e68348. doi: 10.7554/eLife.68348 (PMC8118655; doi:10.7554/eLife.68348)
Supplement: Figure 3—source data 2. [file elife-68348-fig3-data2.xlsx]

## Sheet: Row data Figure 3
A	siCTRL 1	siCTRL 2	siCTRL 3	siCTRL 4	siCTRL 5	siUBTD1 1	siUBTD1 2	siUBTD1 3	siUBTD1 4	siUBTD1 5
Asah1	100	100	100	100	100	110.004	108.998	135.453	125.307	127.291
CerS2	100	100	100	100	100	70.3564	88.9727	113.544	92.8969
B
CHX (h)	siCTRL	siUBTD1s1	siUBTD1s2
0	1	1	1
0.5	1.0757	1.05739	1.03575
1	0.893983	1.02918	1.01781
2	0.461731	1.02076	1.08301
D	siCTRL s1 1	siCTRL s1 2	siCTRL s1 3	siAsah1 s1 1	siAsah1 s1 2	siAsah1 s1 3	siAsah1 s2 1	siAsah1 s2 2	siAsah1 s2 3	siUBTD1 s1 1	siUBTD1 s1 2	siUBTD1 s1 3	siUBTD1 s2 1	siUBTD1 s2 2	siUBTD1 s2 3	siAsah1 s1+ siUBTD1 s1 1	siAsah1 s1+ siUBTD1 s1 2	siAsah1 s1+ siUBTD1 s1 3	siAsah1 s1+ siUBTD1 s2 1	siAsah1 s1+ siUBTD1 s2 2	siAsah1 s1+ siUBTD1 s2 3
p-EGFR (Y1068)	100	100	100	111.608	97.8933	95.2822	107.883	88.403	96.322	156.088	166.392	178.338	152.034	144.292	153.494	119.112	80.5403	69.392	118.663	85.3022	78.493
p-EGFR (Y1086)	100	100	100	79.586	89.3821	94.9221	59.9839	95.2929	87.3021	140.331	154.482	152.54	158.648	146.303	134.656	72.3275	93.404	85.7709	68.972	101.587	83.5955
p-STAT	100	100	100	97.3286	88.3921	98.3032	89.8882	69.4932	98.3022	171.529	165.741	154.493	170.623	149.439	133.967	100.131	98.4302	78.403	93.2886	102.577	89.4937
