# Supplementary material for: UBTD1 regulates ceramide balance and endolysosomal positioning to coordinate EGFR signaling
Source: eLife. 2021 Apr 22;10:e68348. doi: 10.7554/eLife.68348 (PMC8118655; doi:10.7554/eLife.68348)
Supplement: Figure 4—source data 2. [file elife-68348-fig4-data2.xlsx]

## Sheet: Row data Figure 4
A
EGF (min)	siCTRL	siUBTD1
30	1	1
60	0.963408	0.982833
120	0.722733	0.973572
180	0.529641	0.991491
B
siCTRL	siCTRL+ EGF	siUBTD1	siUBTD1+EGF
1.07692	1.78571	0.433333	2.06667
1.5	2.43478	1.36364	1.33333
0.264706	1	0.384615	1.64583
1.26667	1.72308	0.655172	1.59322
0.75	2.82143	1.21569	2.04082
0.5625	1.60784	0.575758	2.33333
	1.85	0.363636	3.17778
	1.71429	1.03049	2.44029
	2.78261	1.40283
D
Time (min)	siCTRL 1	siCTRL 2	siCTRL 3	siCTRL 4	siCTRL 5	siCTRL 6	siUBTD1 1	siUBTD1 2	siUBTD1 3	siUBTD1 4	siUBTD1 5	siUBTD1 6	siUBTD1 7
0	15906330	21628610	23044010	15407360			20647610	23450200	25700170	20328080
5	16815440	16773850	21824190	20531090			20206720	20787850	20239630	21265350
10	18758760	19832960	21801560	17458320	18524580	20219260	19100490	21393620	20164860	18252240	26288970
30	18515750	23153450	20082460	19996150	20814350	19341100	18320520	20473180	22168220	19588620	20226360	20191020
120	18988280	17866750	16925980	19710840	20599250	17571730	21609340	19831780	22456040	22151270	22739730	20926830	15946180
180	15780020	15782600	15647570	14050490	15060650	13640020	21719840	21530990	19789100	20638220	20224000	21191950	19716920
260	11019930	9290851	7794908	9236956	5666542		18133960	12257800	10613550	14798660	12734440	15215010	16472280
E
Time (min)	siCTRL 1	siCTRL 2	siCTRL 3	siCTRL 4	siCTRL 5	siCTRL 6	siCTRL 7	siCTRL 8	siUBTD1 1	siUBTD1 2	siUBTD1 3	siUBTD1 4	siUBTD1 5	siUBTD1 6	siUBTD1 7	siUBTD1 8
0	0	0	0.983	0	1.003	4.536	0.918		0	0	2.135	0	26.402	5.906	0
5	39.369	37.063	47.258	65.029	37.994	22.928	22.189	35.896	48.355	49.168	25.823	92.112	82.707	43.537
10	56.666	56.341	64.04	60.169	77.001	93.872	99.357		60.032	91.656	78.412	126.676
30	51.913	102.5	21.486	33.047	17.507				96.855	101.988	68.905	5.146
60	34.58	25.182	26.72	14.044					65.996	43.051	49.812	55.805	21.905	5.7
120	0	0	0	5.974	0	0	0	0	0	0	0	29.613	3.121	17.731	0	0
180	0	0	0	0	0	0	0	0	0	0	3.386	0	0	0	0
260	0	0	0	0	0	0	0	0	0	0	0	0	0	0	0	0
F
Time (min)	siCTRL 1	siCTRL 2	siCTRL 3	siCTRL 4	siCTRL 5	siCTRL 6	siCTRL 7	siCTRL 8	Time (min)	siCTRL 9	siUBTD1 1	siUBTD1 2	siUBTD1 3	siUBTD1 4	siUBTD1 5	siUBTD1 6	siUBTD1 7	siUBTD1 8	siUBTD1 9	siUBTD1 10
0	0	4.27439	0	3.42012	3.83493	0	10.6404	0	2.40771		3.86286	-4.24399	12.0751	0	6.98791	11.1405	13.8793	-4.30134	-7.04202
5	6.4695	5.65866	-2.49843	-1.67703	7.61482	2.77506	4.3169	6.72937	0		12.1385	-2.18013	-1.84628	10.965	2.8445	8.75136	0	0	10.3826	6.24606
10	0	0	9.59697	5.92368	9.05288	8.5795	5.94582	0	11.5605	9.50553	-1.65954	-2.32335	27.6542	-5.57768	32.521	32.0436	3.45227	20.6444	13.5016
30	10.5923	15.0425	19.1957	20.5924	48.7815	32.8144	67.6433	34.7488	19.9144	-9.89385	12.9522	38.8745	38.8644	30.569	15.3356	25.0761	52.1026	42.0866	13.4445
60	57.5541	46.8087	23.7065	42.0197	48.1414	59.4228	105.049	39.5052	23.9323		73.5952	63.9609	71.332	54.749	20.6019	63.7349	52.2581	73.0044	63.3674
120	89.9305	127.821	104.045	47.4811	160.718	132.428	86.3806	65.0289	86.168		194.977	136.671	156.478	172.304	152.8	197.637	176.553	121.674	123.43
180	87.0728	101.705	44.7657	66.1633	70.7332	96.2229	68.758	73.1186	69.1478	80.3544	138.866	144.504	157.778	148.046	115.455	132.625	133.607	181.357	150.573
260	50.5237	63.8563	66.649	56.9316	40.8552	42.967	63.3432	62.5479	51.0337	64.3411	117.978	130.004	139.285	128.623	101.762	96.5023	137.095	92.6394	115.187

## Sheet: Row data figure supplement 1
A
EGF (MIN)	siCTRL	siUBTD1s1	siUBTD1s2
0.5	1	1	1
1	0.854721	0.981728	0.967893
2	0.756471	1.06442	0.931504
3	0.698087	1.08473	0.926148
C
Time (min)	siCTRL 1	siCTRL 2	siCTRL 3	siCTRL 4	siCTRL 5	siCTRL 6	siCTRL 7	siCTRL 8	siUBTD1 1	siUBTD1 2	siUBTD1 3	siUBTD1 4	siUBTD1 5	siUBTD1 6	siUBTD1 7	siUBTD1 8
0	1199	913	1041	1112	1040	921	1238		1329	1138	844	1244	903	1024	852
5	1160	932	890	1109	1148	994	1174	694	1001	685	806	1016	750	915
10	743	1091	562	910	686	738	870		847	583	1025	967
30	1208	809	463	1101	1336				797	986	659	1087
60	833	1085	977	1215	1264				917	1241	1005	1085	839	1195
120		1370	1356	1237	1582		1192		954			943		1022	1003	1290
180	1537	1266	1512	1443	1569	2031	1753	1518	1773	1816	1653	1665	1931	1615	1726
260	1307	1357	1223	1328	1312	1107	1426	1301	1046	1712	1445	952	1825	1000	1524	1689
D
Time (min)	siCTRL 1	siCTRL 2	siCTRL 3	siCTRL 4	siCTRL 5	siCTRL 6	siCTRL 7	siCTRL 8	siCTRL 9	siCTRL 10	siCTRL 11	siCTRL 12	siCTRL 13	siCTRL 14	siCTRL 15	siCTRL 16	siUBTD1 1	siUBTD1 2	siUBTD1 3	siUBTD1 4	siUBTD1 5	siUBTD1 6	siUBTD1 7	siUBTD1 8	siUBTD1 9	siUBTD1 10	siUBTD1 11	siUBTD1 12	siUBTD1 13	siUBTD1 14	siUBTD1 15	siUBTD1 16
0	1026	1121	1219	1401	1249	1237	1052	732	1327	1366	1311	1218	1193	1054	1239	1301	826	756	661	910	913	1006	690	373	682	825	873	1223	966	876	1313
5	1234	1129	1284	957	1050	1150	1114	952	1155	1301	1080	912	1139	1371	1480	981	1183	1472	868	1022	1129	1281	1189	950	1082	1286	1155	879	1065	1436	1382	1446
10	1051	1136	1008	817	897	1134	824	1070	1266	1190	875	1156	1072	1264	1350	1311	983	1407	1197	895	822	920	959	871	966	948	639	719	900	1109	1222	1240
30	1259	1101	981	1129	1106	1126	882	1187	1010	1172	1107	943	1127	1083	1147	1251	1055	1439	863	903	998	1028	1058	1092	998	1065	1097	878	1208	986	1141	1177
60	670	780	1049	947	1177	644	634	594	824	1335	915	932	1175	1055	1464		934	912	1072	910	1004	924	723	819	693	1042	967	908	966	1040	1295	928
120	608	666	859	953	848	696	634	963	1291	1265	976	736	1006	1139	1561	1150	715	960	900	923	876	823	674	1037	887	950	642	827	665	849	1246	787
180	1018	866	1066	915	1105	1082	970	1041	1497	1374	1242	929	1172	1248	1379		1077	853	973	867	948	1202		921		1028	1127	909	960	988	1115	1189
260	834	664	800	620	869	943	817	695	866	870	1032	478	902	1079	1046		680	779	717	964	989	1048	279	694	875	751	1051	884	793	879	1350	460
E
Time (min)	siCTRL 1	siCTRL 2	siCTRL 3	siCTRL 4	siCTRL 5	siCTRL 6	siCTRL 7	siCTRL 8	siCTRL 9	siCTRL 10	siCTRL 11	siCTRL 12	siCTRL 13	siCTRL 14	siCTRL 15	siCTRL 16	siUBTD1 1	siUBTD1 2	siUBTD1 3	siUBTD1 4	siUBTD1 5	siUBTD1 6	siUBTD1 7	siUBTD1 8	siUBTD1 9	siUBTD1 10	siUBTD1 11	siUBTD1 12	siUBTD1 13	siUBTD1 14
0	0.695844	0.684164	0.68529	0.690017	0.684211	0.689352	0.692772	0.687357	0.68725	0.699199	0.69152	0.669076	0.68574	0.666673	0.684488	0.669993	0.677739	0.692613	0.674347	0.693939	0.697407	0.69991	0.688194	0.688369	0.691393
5	0.690202	0.69981	0.690683	0.68719	0.685313	0.69559	0.690827	0.686239	0.678747	0.691436	0.677265	0.669591					0.694472	0.716009	0.706399	0.674391	0.700365	0.67045
10	0.720727	0.697338	0.666069	0.690078	0.674343	0.675924	0.683635	0.685611	0.700234								0.692959	0.699405	0.689661	0.683482
30	0.676554	0.693608	0.697991	0.668722	0.687389												0.705767	0.669337	0.706923	0.682929
60	0.693283	0.687657	0.691473	0.689902	0.690428												0.689112	0.684157	0.687164	0.677469	0.696356	0.666572
120	0.673007	0.657904	0.677709	0.689965	0.679067	0.697711	0.669731	0.675312									0.666983	0.67298	0.666341	0.69264	0.695345	0.671789	0.69156	0.691903	0.691658
180	0.691547	0.718837	0.690872	0.684498	0.667309	0.689946	0.687253	0.671629	0.680721	0.678725	0.682887	0.65798	0.672965				0.677258	0.68766	0.680856	0.677628	0.677916	0.689236	0.68147	0.707078	0.695319	0.682242	0.698795
260	0.665985	0.678625	0.680923	0.689811	0.682	0.676182	0.672492	0.681805	0.697151	0.689321	0.697578	0.668491	0.692409				0.679563	0.674226	0.672597	0.670923	0.669584	0.682561	0.667368	0.673517	0.669184	0.687366	0.697264	0.694006	0.686856	0.68151
F
Time (min)	siCTRL 1	siCTRL 2	siCTRL 3	siCTRL 4	siCTRL 5	siCTRL 6	siCTRL 7	siCTRL 8	siCTRL 9	siCTRL 10	siUBTD1 1	siUBTD1 2	siUBTD1 3	siUBTD1 4	siUBTD1 5	siUBTD1 6	siUBTD1 7	siUBTD1 8	siUBTD1 9	siUBTD1 10
0	1.44523	1.45778	1.44503	1.43066	1.42577	1.43021	1.45622	1.45781	1.45455		1.44586	1.43728	1.43264	1.43677	1.45565	1.42358	1.44584	1.46499	1.45897
5	1.43969	1.47002	1.46167	1.45285	1.44551	1.43247	1.4443	1.465	1.46414		1.46262	1.45159	1.47488	1.47123	1.45106	1.44953	1.43617	1.4692	1.45739	1.4396
10	1.4582	1.47214	1.44772	1.43751	1.4692	1.47938	1.44982	1.47185	1.43297	1.45865	1.44704	1.44039	1.46206	1.47157	1.47419	1.46344	1.45248	1.47012	1.42145
30	1.47245	1.43929	1.44552	1.45851	1.45443	1.46385	1.45893	1.46177	1.44377	1.4601	1.44698	1.4359	1.47568	1.46281	1.45556	1.46647	1.44861	1.4552	1.43947
60	1.47608	1.44596	1.43421	1.45112	1.44328	1.44902	1.43457	1.48527	1.44368		1.43286	1.42776	1.4693	1.43766	1.45321	1.44782	1.45144	1.48613	1.44596
120	1.47318	1.48306	1.44012	1.43387	1.45358	1.45273	1.46047	1.45922	1.42823		1.45562	1.43607	1.42455	1.45682	1.45586	1.4825	1.45685	1.44076	1.44358
180	1.45494	1.46373	1.44474	1.4709	1.4514	1.46076	1.47266	1.45589	1.44025	1.4561	1.45421	1.4694	1.46261	1.48052	1.45955	1.45621	1.46951	1.45183	1.45139
260	1.4433	1.44336	1.43047	1.4515	1.45622	1.44277	1.44119	1.46308	1.45569	1.44766	1.4368	1.427	1.46442	1.44928	1.45214	1.45089	1.56277	1.43918	1.42093
H
	EE	LE/MVBs	LYS		EE	LE/MVBs	LYS
siCTRL 1	0	3	6	siUBTD1 1	2	1	3
siCTRL 2	2	6	20	siUBTD1 2	3	5	14
siCTRL 3	2	2	5	siUBTD1 3	4	1	8
siCTRL 4	0	3	6	siUBTD1 4	4	7	18
siCTRL 5	5	2	5	siUBTD1 5	4	2	13
siCTRL 6	1	6	11	siUBTD1 6	2	3	7
siCTRL 7	6	2	3	siUBTD1 7	0	5	13
siCTRL 8	5	4	19	siUBTD1 8	5	2	18
siCTRL 9	3	4	10	siUBTD1 9	12	4	12
siCTRL 10	4	6	22	siUBTD1 10	7	4	24
siCTRL 11	4	3	10	siUBTD1 11	6	11	10
siCTRL 12	5	3	7	siUBTD1 12	2	4	11
siCTRL 13	3	5	12	siUBTD1 13	19	5	10
siCTRL 14	2	2	0	siUBTD1 14	3	7	5
siCTRL 15	4	2	2	siUBTD1 15	3	2	8
siCTRL 16	0	4	24	siUBTD1 16	10	7	11
siCTRL 17	4	5	11	siUBTD1 17	4	3	5
siCTRL 18	3	0	5	siUBTD1 18	3	2	6
siCTRL 19	1	2	6	siUBTD1 19	5	3	8
siCTRL 20	1	3	6	siUBTD1 20	8	2	11
siCTRL 21	0	3	7	siUBTD1 21	0	2	19
siCTRL 22	1	0	4	siUBTD1 22	0	3	14
siCTRL 23	0	0	19	siUBTD1 23	5	2	2
siCTRL 24	3	5	15	siUBTD1 24	3	4	17
siCTRL 25	1	2	5	siUBTD1 25	4	3	17
siCTRL 26	3	3	5	siUBTD1 26	1	4	18
siCTRL 27	2	3	12	siUBTD1 27	0	0	6
siCTRL 28	2	2	19	siUBTD1 28	0	6	26
siCTRL 29	3	3	11	siUBTD1 29	0	1	0
siCTRL 30	7	2	6
siCTRL 31	3	4	25
siCTRL 32	1	2	9
siCTRL 33	3	2	12
siCTRL 34	3	3	9
siCTRL 35	4	3	6
siCTRL 36	3	8	8
siCTRL 37	2	2	13
siCTRL 38	3	2	3
siCTRL 39	14	1	8
siCTRL 40	1	2	7
siCTRL 41	3	2	7
siCTRL 42	3	4	11
J	siCTRL			siUBTD1
Time	Mean	SD	N	Mean	SD	N
0	0	0	9	0	0	9
5	13.515	41.7539	9	20.317	26.6107	9
10	53.944	56.266	9	191.001	30.8901	9
30	112.09	30.6301	9	239.428	30.1455	9
60	379.252	39.7699	9	474.351	38.4777	9
120	561.972	53.7113	9	693.33	49.4747	9
180	606.902	42.2976	9	748.24	72.5344	9
260	847.022	23.3331	9	883.73	76.7188	9
K	siCTRL			siUBTD1
Time	Mean	SD	N	Mean	SD	N
0	0	0	9	0	0	9
30	1570000	415628	9	2370000	281561	9
60	2500000	395887	9	2830000	211504	9
120	3520000	146976	9	3180000	227790	9
180	4060000	157503	9	4430000	192814	9
260	5210000	207953	9	5800000	321344	9

## Sheet: Row data figure supplement 2
A
Time (min)	siCTRL 1	siCTRL 2	siCTRL 3	siCTRL 4	siCTRL 5	siCTRL 6	siCTRL 7	siCTRL 8	siCTRL 9	siCTRL 10	siCTRL 11	siCTRL 12	siCTRL 13	siCTRL 14	siCTRL 15	siCTRL 16	siUBTD1 1	siUBTD1 2	siUBTD1 3	siUBTD1 4	siUBTD1 5	siUBTD1 6	siUBTD1 7	siUBTD1 8	siUBTD1 9	siUBTD1 10	siUBTD1 11	siUBTD1 12	siUBTD1 13	siUBTD1 14	siUBTD1 15	siUBTD1 16
0	9731558	8631835	9774063	10584866	11982516	12588402	6198310	11928924	10199870	11145922	11470447	8310547	9559392	10220444	9654098	9193195	1.13793e+07	8.52414e+06	9.83235e+06	1.10005e+07	1.07881e+07	1.19077e+07	1.09573e+07	1.1322e+07	8.87043e+06	8.73373e+06	1.08814e+07	1.01506e+07	1.04618e+07	8.51412e+06	8.80704e+06	9.04392e+06
10	9703692	9622636	11668393	11355326	10957268	11256896	11120523	11239356	9402487	9935216	10227781	9336526	9014233	8954690	8545868	9206561	9.19353e+06	8.08173e+06	9.55417e+06	1.08678e+07	1.10093e+07	1.23783e+07	1.13484e+07	9.38127e+06	9.0569e+06	10920770	1.17403e+07	9.71789e+06	8.60685e+06	9.21611e+06	9.80738e+06	8.83941e+06
30	10630142	10856394	10387025	10552822	12747782	11718370	11200819	11870298	9647419	9042084	10677938	11049630	9091436	8844287	7529109	7250962	7.46454e+06	7.71191e+06	9.68984e+06	8.90045e+06	1.17785e+07	1.11899e+07	1.25481e+07	1.01435e+07	9.34887e+06	1.19792e+07	1.12878e+07	1.12893e+07	1.03376e+07	9.37157e+06	1.04311e+07	9.89553e+06
60	9668500	10780790	8156057	10619012	11323090	11692727	10699746	10286040	10255478	8112132	7299211	11030252	11777009	10836505	10632080	9337294	1.11506e+07	1.26523e+07	10741350	9.7185e+06	1.10364e+07	11235083	1.00546e+07	8.55905e+06	9.02936e+06	9.99475e+06	1.03491e+07	9.81303e+06	9.3545e+06	8.43687e+06	8.53329e+06	8.31528e+06
120	11357963	11283786	11361240	11305767	8254883	9975166	11432678	11709233	11886769	6714506	8155101	6027543	11020808	10831791	10794820	11006889	1.00752e+07	9.40951e+06	1.07016e+07	9.41896e+06	9.75474e+06	1.05775e+07	1.18479e+07	1.12497e+07	1.17684e+07	11248558	9.76839e+06	1.00807e+07	9.31452e+06	9.85081e+06	1.10761e+07	8.2495e+06
180	10071582	9829081	8762678	10650969	6116100	6391739	8652384	9522200	9797530	9495504	7013466	8139966	10564139	9500619	10508411	9160889	8.12714e+06	7.10144e+06	8.16643e+06	1.04387e+07	10700177	1.12905e+07	11618801	1.01765e+07	8.71584e+06	1.07438e+07	1.18408e+07	1.05371e+07	1.0765e+07	1.10825e+07	7.71139e+06	1.02486e+07
260	9584304	9140146	8819302	9712438	5743964	5330189	9713630	6786775	7901944	6686963	8587778	8137827	9619707	7998683	7558750	5666773	6.08662e+06	5.31978e+06	9.76736e+06	8.82593e+06	1.03929e+07	8.82468e+06	1.09093e+07	9.64411e+06	8.6957e+06	9.83216e+06	1.07324e+07	8693991	9.89487e+06	9.30899e+06	7.60144e+06	8.81913e+06
B
siCTRL	siCTRL+ HGF	siUBTD1	siUBTD1+HGF
0.23	1.31053	0.037037	0.765625
0.0512821	0.76	0.0714286	0.967213
0.156667	1.44444	0.0526316	1.40351
0.123548	1.21111	0.0697674	1.2449
0.14	0.831429	0.0857143	0.981818
	0.537241		3.07143
D	siCTRL 1	siCTRL 2	siCTRL 3	siCTRL 4	siCTRL 5	siCTRL 6	siUBTD1 1	siUBTD1 2	siUBTD1 3	siUBTD1 4	siUBTD1 5	siUBTD1 6
EGFR	100	100	100	100	100	100	143.356	215.511	179.902	238.712	205.872	217.399
Met	100	100	100	100	100	100	150.004	148.998	165.453	175.307	147.291	265.976
TGFR II	100	100	100	100	100	100	123.713	152.838	109.581	119.385	145.832	288.795
TFR	100	100	100	100	100	100	70.3564	104.251	125.901	88.9727	113.544	92.8969
IL2-R	100	100	100	100	100	100	110.214	96.1594	74.6085	97.1641	85.5324	106.234
E	siCTRL 1	siCTRL 2	siCTRL 3	siUBTD1 1	siUBTD1 2	siUBTD1 3
EGFR	100	100	100	115	71	137
Met	100	100	100	87	135	126
TGFR II	100	100	100	116	130	68
TFR	100	100	100	111	93	68
IL2-R	100	100	100	115	106	77
UBTD1	100	100	100	28	16	1
