# Supplementary material for: UBTD1 regulates ceramide balance and endolysosomal positioning to coordinate EGFR signaling
Source: eLife. 2021 Apr 22;10:e68348. doi: 10.7554/eLife.68348 (PMC8118655; doi:10.7554/eLife.68348)
Supplement: Figure 5—source data 2. [file elife-68348-fig5-data2.xlsx]

## Sheet: Row data Figure 5
E	siCtrl	siUBTD1		F	siCtrl	siUBTD1		G	GFP	GFP-UBTD1		H	GFP	GFP-UBTD1		I	GFP	GFP-UBTD1
	2.43517	3.38909			3.66596	3.42077			3.91862	6.7374			1.56391	1.26638			2.13257	2.09455
	2.33359	3.5023			4.24218	3.61735			3.30818	4.28603			1.3433	1.35224			1.72642	1.16187
	2.75801	3.73618			4.50513	3.81577			4.94163	5.79612			1.63695	1.2059			2.37801	0.909786
	2.80499	3.34821			4.32468	3.83582			4.34846	5.80018			2.69499	1.39945			2.00625	0.816157
	2.65324	3.30332			3.61866	3.85419			5.81694	4.97806			1.58497	1.03981			1.73949	0.404751
	2.30518	3.14871			3.89218	4.93904			4.49816	5.22704			1.60188	1.5674			2.07153	0.485636
	3.36037	2.67839			3.76554	3.90509			4.186	3.75305			2.37923	1.16204			2.71145	0.904239
	3.67486	2.48236			3.10205	4.0937			5.2917	4.22122			1.75959	1.09868			3.46925	1.24704
	2.41584	3.73447			4.28226	3.88463			3.72593	4.91811			1.4497	1.15068			1.89325	1.03284
	1.95989	2.9015			4.06956	3.02288			6.4651	3.09216			1.0668	1.24425			2.17341	1.52734
	2.81635	3.23192			3.98743	3.65982			3.83411	3.84568			1.08267	0.931427			2.55133	0.407928
	2.90176	3.07836			4.35338	4.3198			4.18316	5.7364			1.16705	1.0509			2.14188	0.488817
	2.02532	2.62328			3.81494	3.99931			4.72734	3.44718			1.1852	1.46211			1.90093	0.907548
	3.32629	1.56069			3.34389	3.8761			4.60848	2.70744			1.71831	0.873618			2.27977
	2.24174	3.44723			3.88045	4.37207			5.47692	5.07243			1.57191	0.931978			2.02782
	2.22814	2.84966			4.41572	4.34706			3.71082	2.47764				0.967469			1.93332
	4.13127	2.11855			3.59817	3.47557			5.68954	4.47703				0.8758
	2.90606	2.74258			4.1252	3.74899			4.95423
	3.18653	3.70951			4.15037	3.59311
	2.75809	4.58247			5.62538	5.13798
	3.50903	2.42341			4.40437	5.79831
	3.60206	3.82665			3.87847	3.68038
	2.81536	1.92904			3.44765	3.93214
	3.37344	2.79159			3.52732	4.02741
	2.55992	2.80302			4.11132	3.1512
	2.78786	3.40147			3.71337	3.96406
	2.56918	3.65716			3.39035	3.66332
	3.00242	3.09733			3.87875	6.94353
	4.11215	4.04894			4.1192	5.31582
	2.48362	4.26725			4.50437	4.90131
	4.06563	3.30133			3.8119	3.02583
	1.8805	4.2647			5.03934	4.204
	3.37772	4.3487			4.17482	2.82522
	2.27372	4.18917			3.88133	3.08579
	2.95984	3.72804			3.67651	5.14352
	2.72521	2.82828			4.71433	5.37124
	3.06928	4.62835			3.82147	6.13962
	4.60704	2.5616			3.54005	3.93443
	2.99837	4.31325			3.05013	4.52463
	3.60671	2.99525			3.04599	3.33609
	3.41687	3.94029			4.87122	3.81717
	4.12421	4.39637			3.69406	5.29209
	3.7887	3.84947			3.50781	3.8251
	3.50785	4.35794			4.73549	3.59826
	3.68486	3.97711			3.81518	3.63593
	4.6087	3.9725			4.35592	3.91395
	2.90706	3.36529			4.85366	5.24326
	3.54265	4.00687			4.86624	3.17431
	3.84516	2.68374			4.16905	5.00034
	3.64634	2.32234			3.3	3.34651
	3.86224	3.23966			4.84113	4.20783
	4.72994	3.96737			3.14759	5.01224
	3.93171	3.39349			4.93337	4.61603
	3.77596	2.74112			3.98025	3.01969
	3.52725	2.77862			3.67115	3.74454
	4.44724	2.80227			4.60375	3.53525
	4.48331	3.32324			4.43781	3.54142
	3.69257	2.57691			5.42202	4.53404
	4.80405	3.57905			3.72462	3.27838
	3.79434	2.66477			3.82323	3.88602
	3.60899	1.92122			4.13844	4.51313
	3.10441	2.44746			3.06334	5.4771
	3.25117	3.05513			3.9772	4.67559
	2.85779	3.94139			4.32691	2.74552
	3.82818	3.67988			4.52894	4.61477
	3.1847	5.48435			4.24656	4.62486
	3.25868	5.16527			3.99368	3.90805
	3.56539	5.48572			5.10059	3.40474
	3.89298	4.09237			3.48697	4.25663
	3.89369	3.92276			3.00944	3.55027
	4.34515	5.22518			2.80171	3.1002
	3.94367	4.52806			4.74308	3.18123
	3.48883	4.56285			3.46864	4.66229
	4.0839	4.54045			3.98612	5.0872
	2.99301	3.55851			2.7699	3.64892
	3.44385	4.9382			4.23185	4.8901
	3.55999	4.10373			4.23667	5.473
	2.7306	5.59016			4.37058	3.98648
	2.75137	3.4968			3.78386	3.36438
	2.92056	3.4231			3.58518	4.93534
	2.97796	4.31376			3.65199	3.79637
	5.37634	4.62282			5.37634	3.94139
	3.50397	5.06487			3.50397	3.67988
	3.50008	4.24302			3.50009	5.48435
	3.49227	4.0997			3.49217	5.16527
	4.76649	4.7145			4.76649	5.48572
	4.38784	4.89493			4.38784	4.09237
	4.33199	4.93873			4.33189	3.92276
	3.67598	3.82312			3.67598	5.22518
	3.05661	4.44084			3.05661	4.52806
	4.1242	4.23612			4.1242	4.56285
	5.21389	4.02053			5.21389	4.54045
	3.79917	3.36981			3.79917	3.55851
	3.60578	2.91109			3.50578	4.9382
	4.63086	3.81628			4.43086	4.10373
	4.77796	5.41311			4.87796	5.59016
	3.323	4.61033			3.323	3.4968
	4.06069	4.59306			4.06269	3.4231
	4.45871	4.0113			4.45571	4.31376
	4.20188	4.86205			4.20188	4.62282
	3.21655	4.69693			3.21655	5.06487
	4.93665	3.48529			4.93665	4.24302
	3.47969	3.90176			3.47969	4.0997
	4.03603	4.8707			4.03603	4.7145
	3.06362	3.03765			3.06362	4.89493
	4.0637	3.84303			4.0637	4.93873
	3.76377	5.5445			3.76377	3.82312
	3.88388	4.0988			3.88388	4.44084
	5.84182				5.84182	4.23612
	5.10802				4.80802	4.02053
	3.84111				3.84111	3.36981
	3.39594				3.39594	2.91109
	4.07701				4.37701	3.81628
	3.33434				3.33434	5.01311
	3.66499				3.66499	4.61033
	4.57187				4.57117	4.79306
	4.91967				4.91967	4.7113
	3.65574				3.65574	4.86202
	3.64503				3.64593	4.69695
	4.43321				4.43582	3.48525
	3.20201				3.15201	3.90196
	3.85822				3.74822	4.87068
	5.40661				5.30559	3.03777
	3.197				3.29723	3.84303
						5.34478
						4.13988

## Sheet: Row data figure supplement 1
A	siCtrl	siUBTD1		B	siCtrl	siUBTD1
	4.21652	2.72975			4.19397	3.71984
	2.16554	2.01904			3.46603	2.01899
	2.55952	2.7439			3.85595	4.16737
	2.22482	4.51512			3.72026	2.86518
	3.83459	3.51942			5.98109	3.53763
	3.62375	4.8099			5.31044	3.63202
	3.97399	1.81607			5.40794	4.04132
	1.87879	5.0774			3.98802	3.16535
	2.92748	6.15025			4.38476	3.11231
	1.38675	2.76442			3.22644	3.15949
	2.90381	4.4702				3.30053
	3.89129	0.168919				2.97261
	2.73684	2.89047				3.21229
	4.71204	4.28305				2.20798
	3.04182					2.2255
	4.02129					3.46505
	3.95095					3.24659
						2.30001
						4.3203
						2.5676
