# Supplementary material for: UBTD1 regulates ceramide balance and endolysosomal positioning to coordinate EGFR signaling
Source: eLife. 2021 Apr 22;10:e68348. doi: 10.7554/eLife.68348 (PMC8118655; doi:10.7554/eLife.68348)
Supplement: Figure 6—source data 2. [file elife-68348-fig6-data2.xlsx]

## Sheet: Row data Figure 6
B	siCtrl	siUBTD1S1	siUBTD1S2
	100	129.253	140.913
	100	151.558	143.683
	100	168.471	181.898
C
CHX (h)	siCTRL	siUBTD1s1	siUBTD1s2
0	1	1	1
0.5	1.06474	0.947688	0.946868
1	1.01429	1.24134	1.04209
2	0.664508	1.04416	1.15777
4	0.459656	1.25788	1.07131
D	siCTRL	siUBTD1s1	siUBTD1s2
	72.375	5.5	22
	69.9412	4.33333	13.3333
	92.3333	3.25	2
	56.4	9	8
	93.5833	6	16.3333
	44.76	11	13
	69.6923	5	17
	70.75	11.5	6.5
	43.125	11	10.6667
	114	18	7
	53.4	7.6	8
	35	16	13.5
	58.6667	10	18.6667
	47.75	4.5	24
	54.3333	20	20
	65	9.8	0
	58.75	13.5	12
	47.1111	10.4	28
		11	9.33333
		35	35
		21.5	10.5
		53	27
		8.5625	16
		6.78261	20.75
		5.33333	4
			3.74194
			3.08333
			2.75
E
	siCtrl 1	siCtrl 2	siCtrl 3	siRNF26 1	siRNF26 2	siRNF26 3	siUBTD1 1	siUBTD1 2	siUBTD1 3	siRNF26 +siUBTD1 1	siRNF26 +siUBTD1 2	siRNF26 +siUBTD1 3
EGFR	100	100	100	203.582	135.099	189.269	222.146	145.105	156.668	213.404	151.043	132.937
P62	100	100	100	188.656	149.687	201.007	149.073	155.828	194.688	141.46	198.804	169.452
F	siCTRL 0h 1	siCTRL 0h 2	siCTRL 0h 3	siCTRL 1h 1	siCTRL 1h 2	siCTRL 1h 3	siCTRL 3h 1	siCTRL 3h 2	siCTRL 3h 3	siUBTD1 s1 0h 1	siUBTD1 s1 0h 2	siUBTD1 s1 0h 3	siUBTD1 s1 1h 1	siUBTD1 s1 1h 2	siUBTD1 s1 1h 3	siUBTD1 s1 3h 1	siUBTD1 s1 3h 2	siUBTD1 s1 3h 3	siUBTD1 s2 0h 1	siUBTD1 s2 0h 2	siUBTD1 s2 0h 3	siUBTD1 s2 1h 1	siUBTD1 s2 1h 2	siUBTD1 s2 1h 3	siUBTD1 s2 3h 1	siUBTD1 s1 3h 2	siUBTD1 s1 3h 3
LC3	100	100	100	150.832	143.028	164.904	232.526	213.948	245.302	217.413	231.044	243.193	250.14	265.293	255.934	261.721	276.33	265.33	218.109	243.492	234.292	249.364	260.393	255.392	228.263	275.303	255.303
p62	100	100	100	139.022	123.934	125.339	168.895	145.028	176.3	154.26	143.292	150.938	145.432	165.302	155.228	160.432	176.303	184.302	144.307	145.322	153.202	170.01	156.303	165.392	202.334	187.493	198.392

## Sheet: Row data figure supplement 1
A	siCtrl	siUBTD1
	100	114.328
	100	110.925
	100	157.22
	100	115.928
	100	112.505
B
CHX (h)	siCTRL	siUBTD1
0	1	1
0.5	0.840565	0.983578
1	0.727225	0.866789
2	0.736372	0.900552
3	0.587061	0.939972
C	siCTRL	siUBTD1
	82.5	21.5
	61.6667	31
	77.5	21.5
	96	12.875
	103.5	12.5
	85.625	17.5
	73.2	10.75
	54.25	15
	63.7143	3.28571
	68
	58.7778
D	siCTRL 0h 1	siCTRL 0h 2	siCTRL 0h 3	siCTRL 1h 1	siCTRL 1h 2	siCTRL 1h 3	siCTRL 3h 1	siCTRL 3h 2	siCTRL 3h 3	siUBTD1 0h 1	siUBTD1 0h 2	siUBTD1 0h 3	siUBTD1 1h 1	siUBTD1 1h 2	siUBTD1 1h 3	siUBTD1 3h 1	siUBTD1 3h 2	siUBTD1 3h 3
LC3	100	100	100	164.157	159.999	143.029	234.981	206.352	233.049	232.316	189.12	201.004	350.103	276.252	298.028	440.718	369.283	342.028
p62	100	100	100	145.045	157.41	140.556	197.028	215.945	195.045	123.404	202.038	136.404	167.039	187.018	198.203	254.023	385.02	302.023
